# Supplementary material for: Cx43 and Associated Cell Signaling Pathways Regulate Tunneling Nanotubes in Breast Cancer Cells
Source: Preprints.org preprint supplement (doi:10.20944/preprints202009.0192.v1), 2020-09-09
Supplement: Supplementary file 1 [file supplementary]

*Article*

**Cx43 and associated cell signaling pathways regulate tunneling nanotubes in breast cancer cells**

**Alexander Tishchenko 1,†,§, Daniel Domínguez Azorín 1,†,§, Laia Vidal-Brime 1, María José Muñoz 1, Pol Jiménez Arenas 1, Christopher Pearce 1, Henrique Girao 2, Santiago Ramón y Cajal 3,4 and Trond Aasen 1,4,5,***

1 Patologia Molecular Translacional, Vall d’Hebron Institut de Recerca (VHIR), Vall d’Hebron Hospital Universitari, Vall d’Hebron Barcelona Hospital Campus, Passeig Vall d'Hebron 119-129, 08035 Barcelona, Spain; [alexander.tishchenko@ugent.be](mailto:alexander.tishchenko@ugent.be), [d.dominguezazorin@dkfz-heidelberg.de](mailto:d.dominguezazorin@dkfz-heidelberg.de), [laia.vidal.b@gmail.com](mailto:laia.vidal.b@gmail.com), [maria.munoz@vhir.org](mailto:maria.munoz@vhir.org), [pol.jimenezarenas@gmail.com](mailto:pol.jimenezarenas@gmail.com), [chrispearce99@yahoo.co.uk](mailto:chrispearce99@yahoo.co.uk), [trond.aasen@vhir.org](mailto:trond.aasen@vhir.org)

2 Biomedical Research (iCBR), Faculty of Medicine, University of Coimbra, Azinhaga de Santa Comba, Celas, 3000-548, Coimbra, Portugal; [hmgirao@fmed.uc.pt](mailto:hmgirao@fmed.uc.pt)

3 Anatomía Patológica, Vall d’Hebron Hospital Universitari, Vall d’Hebron Barcelona Hospital Campus, Passeig Vall d'Hebron 119-129, 08035 Barcelona, Spain; [sramon@vhebron.net](mailto:s.ramonsramon@vhebron.net)

4 CIBER de Cáncer (CIBERONC), Instituto de Salud Carlos III, Avenida de Monforte de Lemos 3-5, 28029 Madrid, Spain

5 Universitat Autònoma de Barcelona, 08193 Bellaterra, Spain

***** Author to whom correspondence should be addressed: [trond.aasen@vhir.org](mailto:trond.aasen@vhir.org); Tel.: +34-93489-4168.

§ Alexander Tishchenko and Daniel Domínguez Azorín contributed equally to this work.

† Current address: Department of Virology, Parasitology and Immunology, Faculty of Veterinary Medicine, Ghent University, Belgium.

‡ Current address: Clinical Cooperation Unit Neuro-Oncology, German Cancer Consortium (DKTK), German Cancer Research Center (DKFZ), Heidelberg, Germany.

Received: date; Accepted: date; Published: date

**Abstract:** Connexin 43 (Cx43) forms gap junctions that mediate the direct intercellular diffusion of ions and small molecules between adjacent cells. Cx43 displays both pro- and anti-tumorigenic properties, but the mechanisms underlying these characteristics are not fully understood. Tunneling nanotubes (TNTs) are long and thin membrane projections that connect cells, facilitating the exchange of not only small molecules, but also larger proteins, organelles, bacteria, and viruses. Typically, TNTs exhibit increased formation under conditions of cellular stress and are more prominent in cancer cells, where they are generally thought to be pro-metastatic and to provide growth and survival advantages. Cx43 has been described in TNTs, where it is thought to regulate small molecule diffusion through gap junctions. Here, we developed a high-fidelity CRISPR/Cas9 system to knockout (KO) Cx43. We found that loss of Cx43 expression was associated with significantly reduced TNT length and number in breast cancer cell lines. Notably, secreted factors present in conditioned medium stimulated TNTs more potently when derived from Cx43-expressing cells than from KO cells. Moreover, TNT formation was significantly induced by inhibition of several key cancer signaling pathways that both regulate Cx43 and are regulated by Cx43, including RhoA kinase (ROCK), protein kinase A (PKA), focal adhesion kinase (FAK), and p38. Intriguingly, drug-induced stimulation of TNTs was more potent in Cx43 KO cells than in wild-type cells. In conclusion, this work describes a novel non-canonical role for Cx43 in regulating TNTs, identifies key cancer signaling pathways that regulate TNTs in this setting, and provides mechanistic insight into a pro-tumorigenic role of Cx43 in cancer.

**Keywords:** connexin 43; gap junctions; cancer; intercellular communication; breast cancer; cell signaling; tunneling nanotubes; cell–cell communication; tumor microtubes.

**1.** **Introduction**

Twenty-one human connexin proteins form the main structural units of gap junctions, which are intercellular channels that allow the direct diffusion of ions and small molecules between neighboring cells [[1]](https://paperpile.com/c/Ha8zXc/I6VGK). The critical importance of connexins and gap junctional intercellular communication (GJIC) in normal tissue physiology is evident from the multitude of human diseases associated with connexin mutations and the dysregulation of gap junctions observed in many pathological conditions [[2]](https://paperpile.com/c/Ha8zXc/hIZBR). More than 50 years of research show that GJIC and connexins are implicated in cancer progression and often act as tumor suppressors [[3]](https://paperpile.com/c/Ha8zXc/qJBza). This has led to a significant drive toward the use of connexins as prognostic markers and therapeutic targets in cancer [[4]](https://paperpile.com/c/Ha8zXc/84pcw). Although considered tumor suppressors, emerging evidence suggests that connexins can promote tumor growth and survival, particularly in advanced metastatic disease states [[3–5]](https://paperpile.com/c/Ha8zXc/84pcw+kSa0x+qJBza).

In addition to facilitating GJIC, connexins are thought to possess channel-independent functions. Numerous such functions have been described for connexin 43 (Cx43), the most widely expressed and studied connexin. Notably, many protein–protein interactions in the Cx43 C terminus are thought to regulate important cancer signaling pathways such as c-Src [[6]](https://paperpile.com/c/Ha8zXc/fu5Nj). Interestingly, Cx43 can take up residence in unexpected intracellular compartments, including the inner membrane of mitochondria and the nucleus [[7]](https://paperpile.com/c/Ha8zXc/mnqvx), and Cx43 has been ascribed a functional role in exosomes [[8,9]](https://paperpile.com/c/Ha8zXc/2L4NX+tabk7). Furthermore, we and others have shown that Cx43 produces a single mRNA transcript capable of synthesizing various N-terminally truncated isoforms through a unique mechanism of direct internal translation initiation [[10–12]](https://paperpile.com/c/Ha8zXc/Yq1H3+eP3mz+5dESn). The major truncated form, named GJA1-20k, corresponds to the C-terminal tail of Cx43 and can interact with numerous proteins and regulate malignant features in cancer cells, including proliferation, migration, and epithelial-to-mesenchymal transition (EMT) [[6]](https://paperpile.com/c/Ha8zXc/fu5Nj). Notably, GJA1-20k modulates the motility and biogenesis of mitochondria [[13,14]](https://paperpile.com/c/Ha8zXc/FWLI6+mmkGm) and regulates actin dynamics [[15]](https://paperpile.com/c/Ha8zXc/nWiL4). GJA1-20k has also been described in exosomes [[16]](https://paperpile.com/c/Ha8zXc/R24MF) and, surprisingly, in the nucleus, where it may act as a transcriptional regulator of N-cadherin during EMT [[17]](https://paperpile.com/c/Ha8zXc/teraK). These emerging non-canonical functions of Cx43 are providing new biological insight into cancer, as well as therapeutic opportunities [[4,18]](https://paperpile.com/c/Ha8zXc/84pcw+hP1CJ). However, dissection of the channel-dependent and -independent functions driving both the anti- and pro-tumorigenic pathways remains a major challenge.

Tunneling nanotubes (TNTs), first described in 2004 [[19]](https://paperpile.com/c/Ha8zXc/6gLSW), are thin, actin-based, membrane bridges enclosed in a lipid bilayer that connect cells over distances of up to several cell diameters [[20,21]](https://paperpile.com/c/Ha8zXc/kRUO5+Maa5t). A wide variety of TNT-mediated cargo transport has been described, including that of ions [[22]](https://paperpile.com/c/Ha8zXc/g3fY5), miRNAs [[23]](https://paperpile.com/c/Ha8zXc/RSm2s), cytosolic proteins [[24]](https://paperpile.com/c/Ha8zXc/hVnG2), and prions [[25–27]](https://paperpile.com/c/Ha8zXc/IvpY0+QwXRx+kOoOR), pathogens, such as viruses [[28,29]](https://paperpile.com/c/Ha8zXc/J8ay3+ypYEm) and bacteria [[30]](https://paperpile.com/c/Ha8zXc/op4XY), and organelles, such as the endoplasmic reticulum [[31]](https://paperpile.com/c/Ha8zXc/ZkCC6), mitochondria [[32]](https://paperpile.com/c/Ha8zXc/WlCON), Golgi vesicles [[31]](https://paperpile.com/c/Ha8zXc/ZkCC6), endosomes [[33]](https://paperpile.com/c/Ha8zXc/tDYh8), and lysosomes [[33]](https://paperpile.com/c/Ha8zXc/tDYh8). Due to the heterogeneous nature of these transient structures, the terms “thin” and “thick” have been used to differentiate between TNTs with smaller (< 0.7 µm) and larger (> 0.7 µm) diameters, respectively [[33,34]](https://paperpile.com/c/Ha8zXc/tDYh8+TmibX). “Thin” TNTs contain mainly F-actin, whereas “thick” TNTs tend to contain both actin and microtubules. TNTs may originate when two joined cells move apart from each other and remain connected by a thin membranous thread [[35]](https://paperpile.com/c/Ha8zXc/b8hla) or when filopodia-like protrusions from one cell dock with a nearby cell [[19]](https://paperpile.com/c/Ha8zXc/6gLSW). These models are not mutually exclusive. The underlying molecular mechanisms are not fully understood and likely depend on the specific cell type and its environment. Indeed, it appears that several types of TNT-like structures exist, including what are known as tumor microtubes, which are longer and seemingly more stable [[36]](https://paperpile.com/c/Ha8zXc/Glud1). A better understanding of the molecular mechanisms underlying the formation and functions of TNTs is necessary to fully understand their physiological and pathological roles.

Cellular stress, such as hypoxia or a low-serum hyperglycemic medium, seems to stimulate TNT formation. In particular, TNTs have been described in several cancer cell lines, as well as between cancer cells and stromal cells (reviewed in[*[37,38]*](https://paperpile.com/c/Ha8zXc/wZw4z+3zSpW)). TNTs have also been found in primary human tumors [[39–41]](https://paperpile.com/c/Ha8zXc/WZ3Ey+QWlMJ+vCIVG). It is becoming clear that TNTs facilitate a pathway of intercellular conduits in tumors [[42]](https://paperpile.com/c/Ha8zXc/qDkJw) and may promote numerous malignant features such as invasion, growth, chemo- and radiotherapy resistance, and surgery-induced tumor growth [[43,44]](https://paperpile.com/c/Ha8zXc/bkODk+BagYX) [[45]](https://paperpile.com/c/Ha8zXc/NwWno).

Connexins localize to TNTs and regulate intercellular communication [[44,46,47]](https://paperpile.com/c/Ha8zXc/ZM62u+GTOk0+BagYX). Wang et al. [[46]](https://paperpile.com/c/Ha8zXc/ZM62u) identified TNT-mediated voltage-sensitive electrical coupling that was inhibited by the gap junction inhibitor meclofenamate. Cx43 immunoreactivity was observed at one end of the TNTs. Lock et al. [[48]](https://paperpile.com/c/Ha8zXc/IEyjX) showed that TNTs between HeLa cells created cytosolic continuity allowing inositol triphosphate-mediated calcium signaling, but only if a pair of cells were both expressing Cx43. More recently, HIV infection was shown to stimulate TNT formation and connect human macrophages. These TNTs contained Cx43 at the tip, and treatment with the GJIC inhibitors 18-alpha-glycyrrhetinic acid or octanol prevented TNT-mediated cell–cell communication and viral cell–cell spread [[49]](https://paperpile.com/c/Ha8zXc/8FXn5). Although these inhibitors are nonspecific and affect several other targets and channel proteins, the findings suggest that Cx43 channels may be required for the functional establishment of TNTs that then allow the transfer of larger structures (including HIV) that, due to size constraints, do not pass through gap junctions. Notably, recent work suggests that Cx43 regulate TNT formation in normal human trabecular meshwork cells [[50]](https://paperpile.com/c/Ha8zXc/0LlgF). Yao et al. showed Cx43 mediates TNT formation and mitochondrial transfer from human induced pluripotent stem cell-derived mesenchymal stem cells and mouse epithelial cells [[51]](https://paperpile.com/c/Ha8zXc/J8KF7). Mechanistically, Fykerud et al. [[52]](https://paperpile.com/c/Ha8zXc/k5mVI) showed that Cx43 remodeling was driving the formation of actin-based plasma membrane bridges (termed “mitotic nanotubes”) with adjacent cells during mitosis, facilitating vesicle transfer between cells. *In vivo*, glioma cells have been described to form a network of TNT-like structures called microtubes that contribute to tumor invasion in the brain [[40]](https://paperpile.com/c/Ha8zXc/QWlMJ). Cx43-containing gap junctions within this network are thought to turn the tumor into a syncytium of interconnected cells that is highly resistant to radiation therapy, presumably by distributing calcium between cells to prevent apoptosis upon radiation-induced release of intracellular calcium [[40]](https://paperpile.com/c/Ha8zXc/QWlMJ). Brain tumors appear to employ a similar system of microtubes or TNTs to establish connections with neurons to “feed off the brain” [[53]](https://paperpile.com/c/Ha8zXc/23YVR). Similarly, breast cancer cells that metastasize to the brain benefit from the formation of pseudo-tripartite synapses between cancer cells and glutamatergic neurons to promote metastatic growth [[54]](https://paperpile.com/c/Ha8zXc/4jdq9) [[55]](https://paperpile.com/c/Ha8zXc/gSooU). Indeed several studies have described the presence of TNTs in breast cancer cells and between breast cancer cells and macrophages, facilitating drug resistance, invasion, and metastasis [[56–59]](https://paperpile.com/c/Ha8zXc/mKSaT+wiUBA+HS6yH+Rl94K). A large body of data suggests that Cx43 is intricately linked to breast cancer development and may act as a tumor suppressor, particularly at early stages (see reviews [[60–64]](https://paperpile.com/c/Ha8zXc/wPZCq+j9A3Z+qrWsn+49R3L+Zx5Se)). However, increasing evidence suggests that some breast cancers overexpress Cx43, which may facilitate certain malignant and metastatic capabilities. Most notably, the expression of Cx43 was shown to create a syncytium between breast cancer cells and astrocytes, forming a cGAMP-driven paracrine feedback loop that supports tumor growth and chemoresistance [[65]](https://paperpile.com/c/Ha8zXc/XkjSp). Consequently, the GJIC inhibitor meclofenamate is under clinical trial for breast cancer patients with brain metastasis (<https://clinicaltrials.gov/ct2/show/NCT02429570>).

Considering the emerging evidence linking Cx43 and TNTs, we sought to further explore this interplay in breast cancer cells by knocking out Cx43 expression using CRISPR-Cas9 technology. We show that Cx43 significantly regulates the formation and length of TNTs in breast cancer cells. Notably, TNT stimulation was more potent with conditioned medium derived from Cx43-expressing cells than with that from Cx43 KO cells. Furthermore, several pathways that are regulated by Cx43 were identified to induce TNTs. Some of these pathways are novel TNT modulators. These pathways also regulate Cx43 function, and thus the direct association needs to be explored further. Specifically, Cx43 KO cells were more sensitive to drug-induced TNT formation than WT cells. Further elucidation of the role of Cx43 in this setting is an exciting cutting-edge challenge that can provide mechanistic insight into the pro-metastatic features of Cx43 and the regulation of TNTs.

**2. Results**

*2.1. GJA1 knockout reduces TNT number and length in BT549 breast cancer cells*

To achieve full and long-term elimination of Cx43 expression from cells, we developed an all-in-one transient CRISPR/Cas9 expression plasmid that targets *GJA1* (encoding Cx43) and truncated forms of the protein such as GJA1-20k. The well-established PX458 plasmid allows the expression of CRISPR targeting sequences together with a GFP-linked form of Cas9 to control transfection and fluorescence-activated cell sorting (FACS) selection [[66]](https://paperpile.com/c/Ha8zXc/yjuo7). To minimize putative off-target cleavage effects, we replaced the standard Cas9 with the VP12 high-fidelity Cas9 version [[67]](https://paperpile.com/c/Ha8zXc/A3JZf). Specific sequences targeting the coding exon of *GJA1* were introduced. We transfected various cell lines and used FACS to isolate single cells transiently expressing Cas9-GFP. Clones were screened by western blot to detect loss of Cx43 expression. This tool has allowed us to generate a wide variety of cancer cell lines lacking Cx43 expression to evaluate various phenotypic changes related to malignancy.

We noticed that the triple-negative breast cancer cell line BT549 tends to display an extensive TNT network (Figure 1a) that stains for F-actin (Figure 1b). Time-lapse microscopy clearly highlighted this network and showed that the formation of these TNTs may occur through the protrusion of filopodia-like structures that connect to a distant cell and/or through two adjacent cells migrating apart from each other (Supplementary Video S1). We previously showed that this cell line expresses very high levels of full-length Cx43, as well as the 20-kDa truncated form GJA1-20k [[10]](https://paperpile.com/c/Ha8zXc/Yq1H3). We efficiently eliminated *GJA1* expression from this cell line using our CRISPR-Cas9 plasmid (Figure 1c). This led to a marked but not complete loss of GJIC, suggesting that other connexin channels may operate in this cell line (Supplementary Figure S1). Morphologically, we observed a noticeable reduction in the number of TNTs in KO cells compared with WT cells. Detailed quantification demonstrated that loss of Cx43 expression significantly reduced the average numbers of TNTs, both 24 (Figure 1d) and 48 (Figure 1e) hours after seeding.

Next, we decided to deliberately stress cells by culturing them in low-serum hyperglycemic media, a condition previously shown to stimulate TNT formation [[39]](https://paperpile.com/c/Ha8zXc/WZ3Ey). Using such TNT-inductive media (im+), the number of TNTs noticeably but nonsignificantly increased (Figure 1f). The difference between WT and KO cells was significant under im+ conditions (Figure 1f), altogether suggesting that the response to this specific condition of cellular stress is similar in WT and KO cells. In addition to having noticeably thicker TNTs, BT549 cells also display some very thin TNTs at 20× magnification or higher (see white arrow, Figure 1a). After the inclusion of these “thin” TNTs via the analysis of 20× images, the difference between WT and KO cells remained similar and significant (Figure 1g), together with a significant (and expected) increase in the number of TNTs per cell (Figure 1h). Similar to our 10× analysis, our 20× analysis suggested that low-serum hyperglycemic conditions stimulated TNT formation, albeit nonsignificantly (Figure 1i). The results of the detailed 20× analysis seemed to strongly correspond with our 10× analysis in terms of differences between cells and were not repeated for subsequent analyses.

Because there was a significant decrease in the number of TNTs in KO cells, we also compared lengths. We found a significant reduction in TNT length in the absence of Cx43 (Figure 1j). This was noticeable but not significant at 48 hours, possibly because cells are at a higher density at this stage (Figure 1k). TNT-inductive medium (im+) also appeared to increase the length of TNTs in both WT and KO cells (Figure 1l).


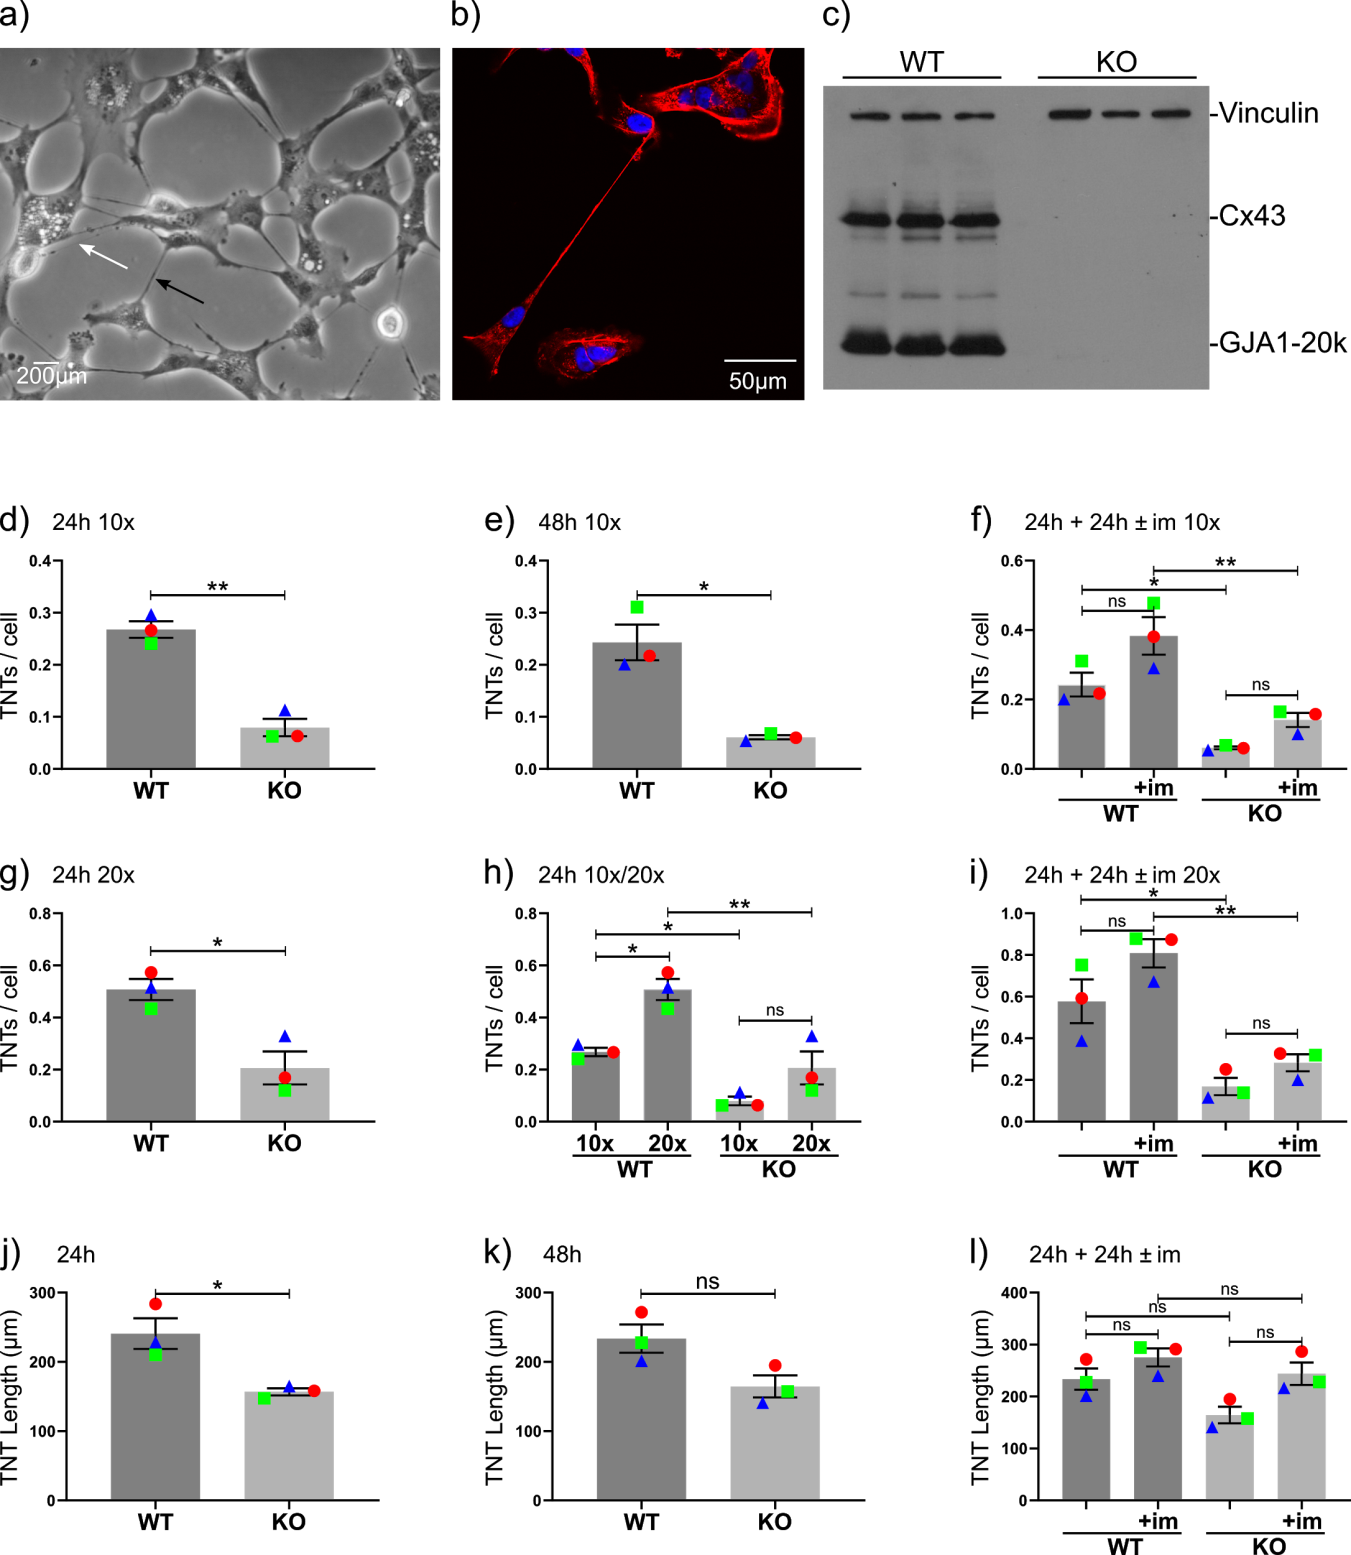


**Figure 1.** TNTs are regulated by Cx43 in BT-549 cells. (**a**) Morphological examples of TNTs in BT549 cells (20×). The black arrow denotes a typical “thick” TNT, whereas the white arrow denotes a typical “thin” TNT that is often only visible at higher magnifications. (**b**) Confocal image of BT-549 cells stained with F-actin and DAPI (nuclei) demonstrating a long, thin, F-actin–positive TNT. (**c**) Western blot with independently isolated samples of three WT and three CRISPR-Cas9 Cx43 KO BT549 cells showing the presence or absence (respectively) of both Cx43 (43 kDa) and the truncated GJA1-20k form (20 kDa), as well as some other weakly expressed truncated forms of Cx43. The blot was co-incubated with a vinculin antibody (124 kDa) as an internal loading control. (**d** and **e**) Average numbers of TNTs per cell in WT and Cx43 KO BT549 cells at 10× (counting thick TNTs) (**d**) 24 hours after seeding, (**e**) 48 hours after seeding with cells, and (**f**) 24 hours after seeding followed by 24 hours refreshed with the same medium or in a low-glucose, low-serum inductive medium (im+) to stimulate TNT formation. (**g**) Average numbers of TNTs per cell in WT and Cx43-KO BT549 cells at 20× (counting thick and thin TNTs) 24 hours after seeding. (**h**) Comparison of the numbers of TNTs counted at 10× and 20×. (**i**) Average numbers of TNTs at 48 hours with or without TNT-inductive medium (im+) for the last 24 hours. (**j–l**) Average lengths of TNTs at (**j**) 24 and (**k**) 48 hours and (**l**) 48 hours with or without treatment with TNT-inductive medium (im+) for the last 24 hours. The means of individual experiments (calculating the average number of TNTs per cell [TNTs/cell] in n=5 images) are highlighted and linked by color and shape to facilitate the tracking of trends between individual experiments. Error bars denote the mean and SEM of three independent biological experiments. Significance was tested with two-way Student’s t-test for single comparisons and one-way ANOVA with Tukey’s post-hoc analysis for multiple comparisons (*p<0.05, **p<0.01, ns = not significant).

*2.2. GJA1 knockout reduces the number of TNTs in Hs578t breast cancer cells*

To confirm that Cx43-mediated regulation of TNT formation is a more general phenomenon and not unique to the BT549 breast cancer cell line, we decided to analyze a second triple-negative breast cancer cell line that expresses high levels of Cx43. We chose to analyze the Hs578t cell line because this Cx43-expressing cell line displayed a considerable amount of TNTs under basal conditions (Figure 2a). Moreover, siRNA-mediated silencing of Cx43 has been shown to affect malignant features in this cell line [[68]](https://paperpile.com/c/Ha8zXc/y0li9). We applied CRISPR/Cas9 to knockout Cx43 (and GJA1-20k) expression (Figure 2b). This led to a significant reduction in the number of TNTs (Figure 2c). However, wild-type Hs578t cells exhibited markedly fewer TNTs compared with BT549 cells (approximately two-fold, Figure 1d vs Figure 2c). Other breast cancer cell lines do not have an appreciable amount of TNTs (see below). Considering that Hs578t cells display an “intermediate” level of TNTs, we considered this cell line an ideal model to test for any positive or negative effects on TNT formation caused by the targeting of specific pathways known to be regulated by Cx43.


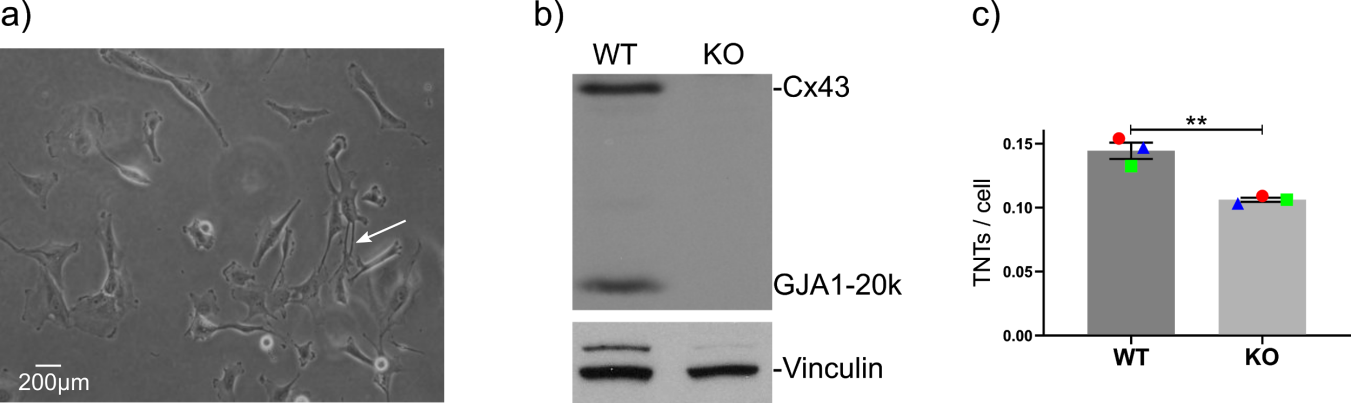


**Figure 2.** TNTs are regulated by Cx43 in HS578t cells. (**a**) Morphological examples of TNTs in HS578t cells (20×). The white arrow denotes a typical TNT. (**b**) Western blot of wild-type and CRISPR-Cas9 Cx43KO Hs578t cells showing the presence or absence of Cx43 (43 kDa) and the truncated GJA1-20k form (20 kDa). Vinculin (124 kDa) was used as a loading control. (**c**) Average numbers of TNTs per cell in WT and Cx43-KO Hs578t cells at 10× (counting thick TNTs) 24 hours after seeding. The means of individual experiments (calculating the average number of TNTs per cell [TNTs/cell] in n=5 images) are highlighted and linked by color and shape to facilitate the tracking of trends between individual experiments. Error bars denote the mean and SEM of three independent biological experiments. Significance was tested using the two-way Student’s t-test (*p<0.05, **p<0.01, ***p<0.001, ns = not significant).

*2.3. Signaling pathways linked to Cx43 differentially affect TNT formation in Cx43 WT and KO cells*

TNT formation is closely linked to the cytoskeletal network, with disruption of F-actin polymerization reducing TNT formation [[69]](https://paperpile.com/c/Ha8zXc/NLMV9). Rho-GTPases regulate actin polymerization, such as during the formation of TNTs [[70]](https://paperpile.com/c/Ha8zXc/9vrg7). RhoA signaling, including Rho-associated protein kinase (ROCK), is regulated by Cx43 in breast epithelial cells [[71]](https://paperpile.com/c/Ha8zXc/RVSvi), an observation supported by us in Hs578t cells (Supplementary Figure S2). RhoA signaling can also affect Cx43 expression levels and channel activity [[72–74]](https://paperpile.com/c/Ha8zXc/exc4y+mmmG2+Lhg2D). We thus decided to inhibit actin stress fiber formation with the ROCK inhibitor Y-27632. In this case, we observed a highly significant increase in the number of TNTs (as illustrated in Figure 3a–d and summarized in Figure 3e). This is consistent with results published for other cell types [[69]](https://paperpile.com/c/Ha8zXc/NLMV9). Curiously, this effect was even stronger in KO cells (mean increase of 0.97 TNTs/cell vs a mean increase of 0.61 TNTs/cell in WT cells). This observation reinforces the idea that the effect of y-27632 is exerted on RhoA signaling and not on any Cx43-related mechanisms. In support of a RhoA-associated mechanism, we observed a trend toward a reduced F-/G-actin ratio in KO cells compared with WT cells (Supplementary Figure S2). As a control for the critical role of F-actin in TNT formation, we applied the actin polymerization inhibitor latrunculin A, which prevents the assembly of F-actin into supramolecular structures. As expected, this reduced the number of TNTs in Hs578t cells, especially in WT cells, which initially contained more TNTs (Figure 3f).

RhoA-ROCK activates p38 [[75]](https://paperpile.com/c/Ha8zXc/5dswM), another signaling pathway that is regulated by Cx43 [[76]](https://paperpile.com/c/Ha8zXc/NnodH) and that regulates Cx43 [[6]](https://paperpile.com/c/Ha8zXc/fu5Nj). We blocked p38 kinase activity using the well-known specific inhibitor SB-203580, which led to a significant increase in the number of TNTs (Figure 3g). Again, an even higher increase was observed in KO cells than in WT cells. This is the first report directly showing that inhibition of p38 activity can be a potent inducer of TNTs. It is worth noting that Cx43 (or the truncated C-terminal tail of Cx43) activates p38 to induce the formation of filopodia through upstream interaction with and activation of p21-activated protein kinase 1 (PAK1) [[76]](https://paperpile.com/c/Ha8zXc/NnodH). Inhibition of both p38 and PAK1 reduces filopodia formation [[76]](https://paperpile.com/c/Ha8zXc/NnodH). We also tested the PAK1 inhibitor IPA3 but did not observe any significant changes in WT or KO cells (Figure 3h). However, IPA3 does not efficiently inhibit PAK2, a kinase that affects RhoA signaling [[77]](https://paperpile.com/c/Ha8zXc/9VR7J). The fact that both Cx43 and p38 signaling affect TNT (this study) and filopodia [[76]](https://paperpile.com/c/Ha8zXc/NnodH) formation in an opposite manner indicates that subtle mechanistic differences are important and is in accordance with reports that the formation of TNTs and filopodia are driven by distinct opposing actions of the actin regulatory complexes [[78]](https://paperpile.com/c/Ha8zXc/5TXdu).

Another signaling pathway that regulates the actin cytoskeleton and F-actin dynamics is the cyclic AMP-dependent protein kinase (cAMP/PKA) pathway [[79,80]](https://paperpile.com/c/Ha8zXc/po6IN+EloJC). PKA also potently regulates Cx43 gap junctions [[81]](https://paperpile.com/c/Ha8zXc/QAXeV), the same gap junctions that are a major conduit for cAMP transfer between cells. Activation of cAMP/PKA signaling, using either forskolin or the cAMP analog 8-Br-cAMP, can restore Cx43 gap junctional activity [[82]](https://paperpile.com/c/Ha8zXc/LazOo). Notably, activation of PKA by forskolin or 8-Br-cAMP inhibits downstream RhoA-ROCK signaling [[83]](https://paperpile.com/c/Ha8zXc/j154L). In Hs578t cells, treatment with both 8-Br-cAMP (Figure 3i) and forskolin (Figure 3j) significantly induced TNT formation in WT cells, and even more so in KO cells (forskolin reached high significance in a comparison between stimulated WT and KO cells). We also inhibited PKA activity using the drug H89. Surprisingly, this also potently stimulated TNT formation (Figure 3k). However, H89 also specifically inhibits downstream RhoA-ROCK signaling and H89 might not be suitable as an antagonist of PKA in systems in which ROCK signaling is important [[84]](https://paperpile.com/c/Ha8zXc/2D7kZ).

The extracellular signal-regulated kinase (ERK)/RhoA/focal adhesion kinase (FAK) network also regulates the cytoskeletal network. FAK interacts with c-Src to mediate many downstream signaling pathways, including RhoA signaling [[85]](https://paperpile.com/c/Ha8zXc/SFarz). Indeed, β1 integrin-mediated modulation of a FAK–RhoA–actomyosin signaling axis regulates membrane protrusions [[86]](https://paperpile.com/c/Ha8zXc/FNTTy). Notably, Cx43 is phosphorylated by Src and, conversely, a region of the Cx43 C terminus also regulates c-Src activity and Src/FAK signaling [[87]](https://paperpile.com/c/Ha8zXc/XwmR3). We therefore treated cells with the FAK inhibitor PF 431396. This inhibitor significantly increased TNT numbers in both WT and KO cells (Figure 3l). We also tested a short inhibitory peptide known to inhibit FAK/Src activity [[87]](https://paperpile.com/c/Ha8zXc/XwmR3) but did not observe any major difference (Supplementary Figure S3).


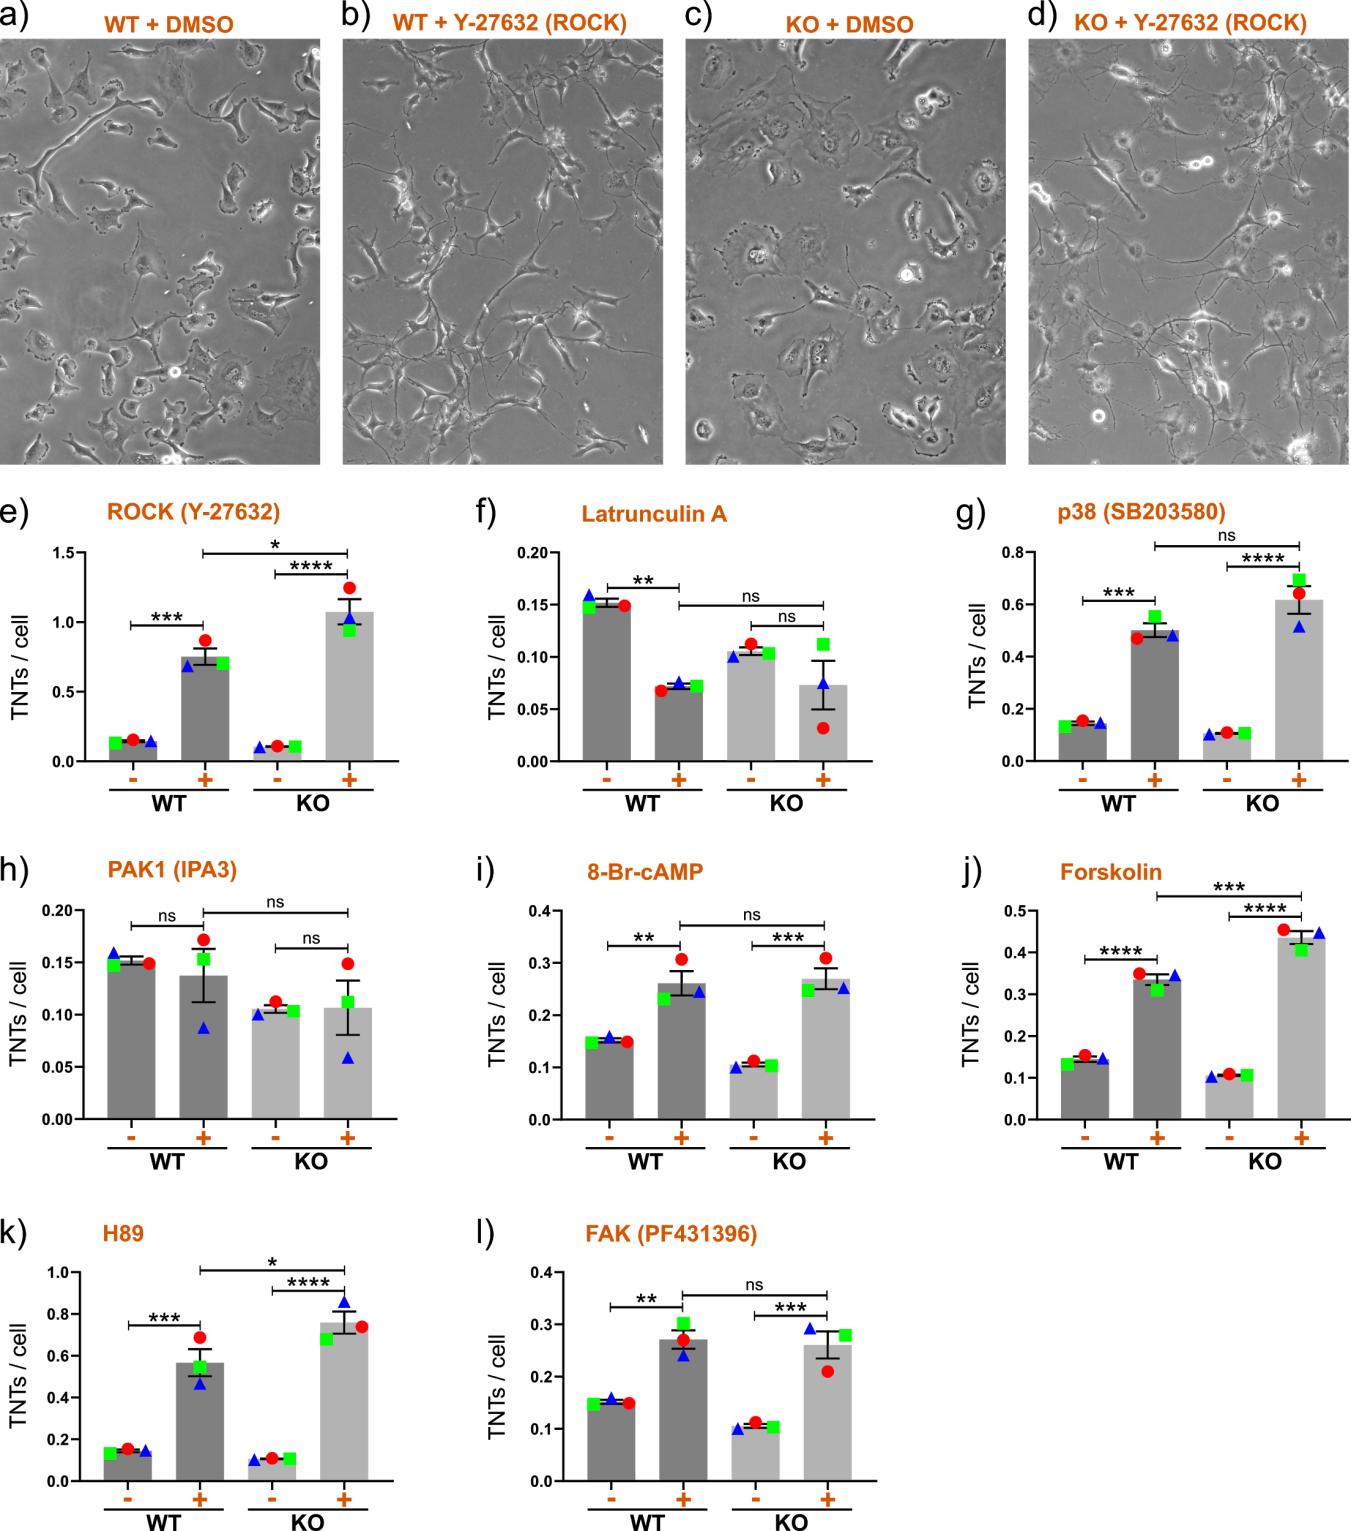


**Figure 3.** Drug-induced TNT formation in Hs578t cells upon overnight (16-hour) stimulation. (**a–d**) Examples of morphology and TNTs in WT and KO Hs578t cells stimulated overnight with DMSO control or the ROCK inhibitor Y-27632, which significantly increased the number of TNTs. (**e–l**) Quantification of the average numbers of TNTs in WT and KO Hs578t cells in DMSO control (-) and drug-stimulated (+) cells, as specified in each graph. The means of individual experiments (calculating the average number of TNTs per cell [TNTs/cell] in n=5 images) are highlighted and linked by color and shape to facilitate the tracking of trends between individual experiments. Error bars denote the mean and SEM of three independent biological experiments. Significance was tested using one-way ANOVA with Tukey’s post-hoc analysis for multiple comparisons (*p<0.05, **p<0.01, ***p<0.001, ****p<0.0001, ns = not significant).

*2.4. Drug-induced stimulation of TNTs in the presence or absence of Cx43 in cell lines expressing very high or very low numbers of TNTs under normal conditions*

Because Y-276332 (ROCK inhibitor) and H89 were exceptionally potent at stimulating TNT formation, we decided to test these agents in the breast cancer cell line SUM159PT, which displays very few TNTs under basal conditions, despite expressing some Cx43 (but low levels of GJA1-20k). We also generated a Cx43 KO version of this cell line (Figure 4a). Both Y-276332 (Figure 4b) and H89 (Figure 4c) stimulated the *de novo* formation of TNTs in both WT and KO cells, although the results were only significant in KO cells. Indeed, TNT induction was significantly more potent in KO cells (16.8-fold and 4.3-fold more potent stimulation in KO cells than in WT for ROCK and H89, respectively). We also confirmed that these inhibitors potently stimulated TNT formation in the BT549 cell line, which already expresses a very high number of TNTs (Figure 4d and e). In this instance, overall TNT induction was slightly less potent in KO cells than in WT cells (although the ratio increase was still higher). A complex interplay between Cx43-related pathways is involved in TNT formation.


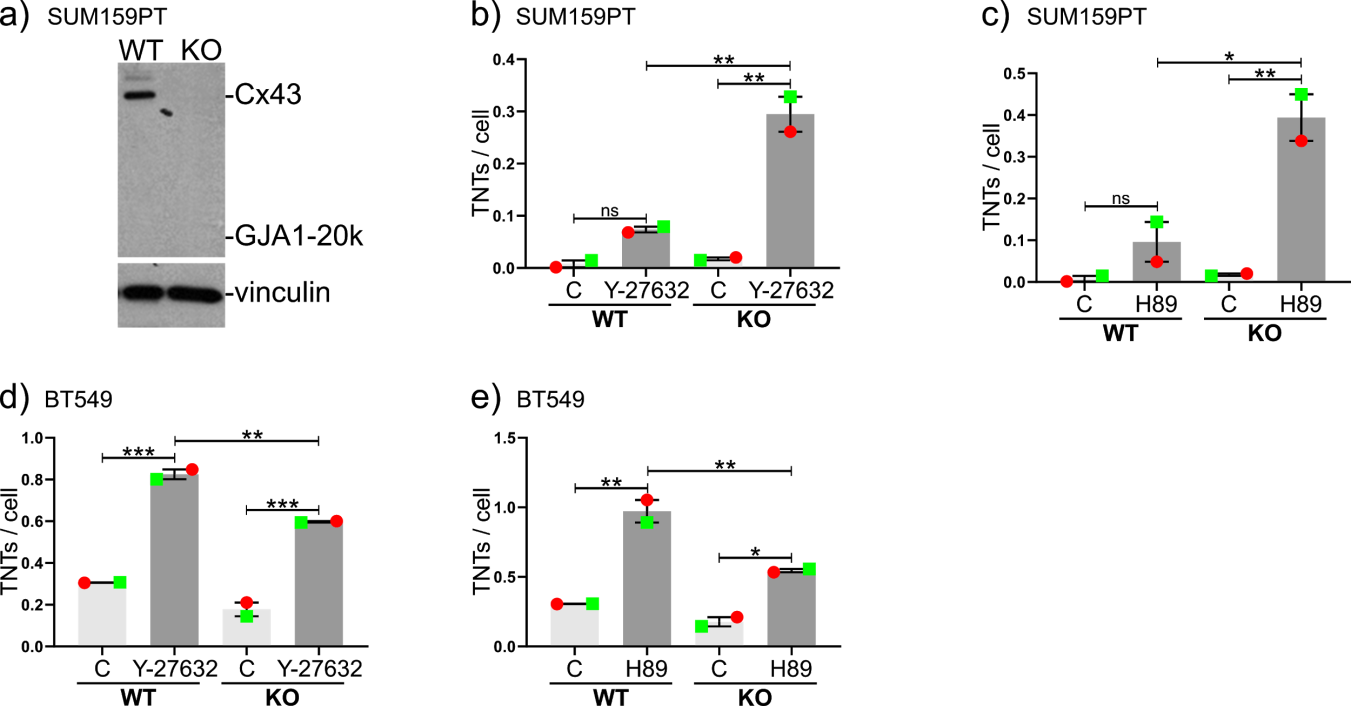


**Figure 4.** Drug-induced TNT formation in SUM159PT and BT549 cells. (**a**) Western blot of wild-type and CRISPR-Cas9 Cx43 KO cells showing the presence or absence of Cx43 (43 kDa) in SUM159PT cells. Vinculin (124 kDa) was used as a loading control. (**b** and **c**) Average numbers of TNTs per cell in WT and Cx43 KO SUM159PT cells with or without the inhibitors Y-27632 (**b**) and H89 (**c**). (**d** and **e**) Average numbers of TNTs per cell in WT and Cx43-KO BT549 cells with or without the inhibitors Y-27632 (**d**) and H89 (**e**). The means of individual experiments (calculating the average number of TNTs per cell [TNTs/cell] in n=5 images) are highlighted and linked by color and shape to facilitate the tracking of trends between individual experiments. Error bars denote the mean and SEM of two independent biological experiments. Significance was tested using one-way ANOVA with Tukey’s post-hoc analysis for multiple comparisons (*p<0.05, **p<0.01, ***p<0.001, ns = not significant).

*2.5. Further insight into Cx43 pathways stimulating TNT formation*

Our results show that Cx43 stimulates TNT formation in breast cancer cells. Furthermore, inhibition of several pathways linked to Cx43, such as p38 and ROCK, appears to stimulate TNT formation more effectively in KO cells. We adopted several experimental approaches to obtain additional insight into the molecular pathways through which Cx43 may affect TNTs.

2.5.1. The role of GJIC

GJIC inhibitors such as meclofenamate and 18-alpha-glycyrrhetinic acid affect TNT-mediated cell coupling without affecting TNT formation because their activity is reversible upon drug washout [[46,49]](https://paperpile.com/c/Ha8zXc/ZM62u+8FXn5). We tested the GJIC inhibitor meclofenamate in Hs578t cells because these cells mainly express Cx43 and because KO cells are almost devoid of GJIC (Supplementary Figure S4). Meclofenamate specifically reduced the levels of TNTs in WT cells and not in KO cells, albeit nonsignificantly (Figure 5a). However, flow cytometry analysis of the parachute dye-transfer assay suggested a very modest inhibition of GJIC (Supplementary Figure S4). Another GJIC inhibitor, carbenoxolone (CBX), a glycyrrhetinic acid derivative (that notably also affects Cx43 levels and inhibits pannexin1 channels), also seemed to specifically reduce TNT levels in WT cells (Figure 5b). However, due to nonspecific and potentially toxic effects of these inhibitors and considering the sensitivity of TNTs to injury, for example, additional experiments are required to conclude whether GJIC directly affects TNT formation or only TNT function. Toward this, a preliminary peptide-screen indicated that the channel- and hemichannel-inhibiting Cx43 mimetic peptide Gap27 does not seem to have a major effect on TNT levels (Supplementary Figure S3).

2.5.2. Channel-independent effects

On the other hand, regulation of the cytoskeleton (critical for TNT formation) is thought to be mediated by non-junctional features of the Cx43 C terminus [[6,88]](https://paperpile.com/c/Ha8zXc/4B0Aj+fu5Nj). For example, overexpression of the Cx43 C terminus regulates filopodia formation [[76]](https://paperpile.com/c/Ha8zXc/NnodH) and the independently translated Cx43 C-terminal protein GJA1-20k regulates actin dynamics [[15]](https://paperpile.com/c/Ha8zXc/nWiL4). We therefore overexpressed either GJA1-20k or Cx43 in Hs578t Cx43KO cells and quantified the levels of TNTs. Increased TNT formation was observed (Figure 5c), but the effect was relatively weak and did not reach statistical significance, even in control Cx43-overexpressing cells. Additional approaches, including overexpression in the absence of GFP, are needed to draw firmer conclusions.

**
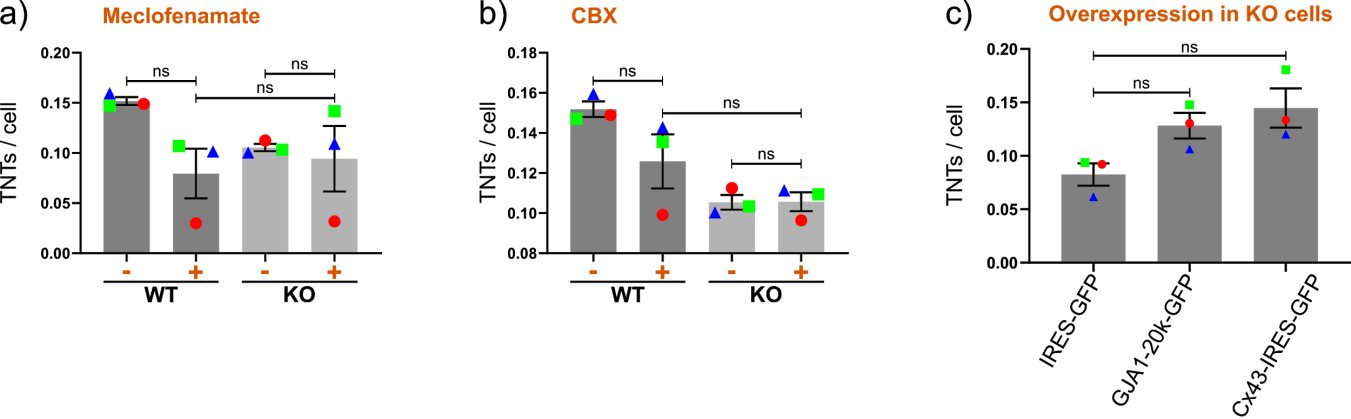
**

**Figure 5.** Stimulation of TNT formation through GJIC and GJA1-20k. (**a**) Inhibition of GJIC by meclofenamate. (**b**) Inhibition of GJIC by carbenoxolone (CBX). (**c**) Overexpression of Cx43 and GJA1-20k in Hs579t Cx43 KO cells. The means of individual experiments (calculating the average number of TNTs per cell [TNTs/cell] in n=5 images) are highlighted and linked by color and shape to facilitate the tracking of trends between individual experiments. Error bars denote the mean and SEM of three or more independent biological experiments as indicated. Significance was tested using one-way ANOVA with Tukey’s post-hoc analysis for multiple comparisons (*p<0.05, **p<0.01, ***p<0.001, ****p<0.0001, ns = not significant).

2.5.3. Induction of TNTs by conditioned media

Previous work has shown that conditioned medium from macrophages stimulates TNT formation in breast cancer cells [[57,59]](https://paperpile.com/c/Ha8zXc/Rl94K+wiUBA). Cx43 significantly alters the secretome and affects features such as the actin cytoskeleton [[89]](https://paperpile.com/c/Ha8zXc/Hjzn7). We therefore tested whether Cx43 affected the ability of conditioned medium to induce TNTs. As seen in Figure 6, conditioned medium stimulated TNT formation. Notably, medium from WT cells was significantly more potent than medium from KO cells, suggesting that the presence of Cx43 at least partly stimulates TNT formation by modifying the secretome. Because Cx43 is present in numerous cell types, it will be of particular interest to elucidate the mechanism of Cx43-driven secretome-mediated TNT stimulation.


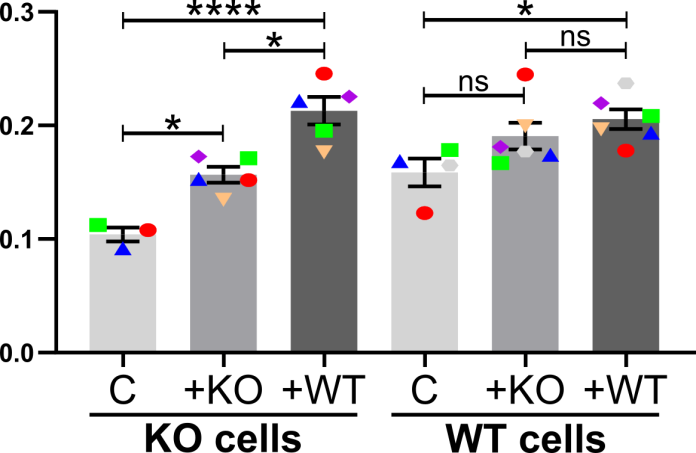


**Figure 6.** Stimulation of TNT formation by conditioned medium in Hs578t cells. Average numbers of TNTs per cell in WT and Cx43 KO Hs578t cells. C = control conditions. +KO = stimulation with conditioned medium derived from Hs578t Cx43 KO cells. +WT = stimulation with conditioned medium derived from Hs578t wild-type cells expressing Cx43. The means of individual experiments (calculating the average number of TNTs per cell [TNTs/cell] in n=5 images) are highlighted and linked by color and shape to facilitate the tracking of trends between individual experiments. Error bars denote the mean and SEM of three or more independent biological experiments, as indicated. Significance was tested using one-way ANOVA with Tukey’s post-hoc analysis for multiple comparisons (*p<0.05, **p<0.01, ***p<0.001, ****p<0.0001, ns = not significant).

**3. Discussion**

In 2004, Rustom et al. [[19]](https://paperpile.com/c/Ha8zXc/6gLSW) published their seminal article describing nanotubular structures termed TNTs that facilitated the selective transfer of membrane vesicles and organelles but seemingly impeded the flow of small molecules such as the gap junction-permeable dye calcein. However, they focused on gap junction-deficient PC12 cells [[90]](https://paperpile.com/c/Ha8zXc/VGHP5) and the same authors and others have since described the presence of gap junction proteins, including Cx43, in TNTs that facilitate electrical and dye coupling between cells [[46,48,49,91]](https://paperpile.com/c/Ha8zXc/FGFwj+ZM62u+IEyjX+8FXn5). Notwithstanding, Cx43 may have multiple functions in TNTs. Here, we show for the first time that Cx43 contributes to the formation of TNTs in breast cancer cells. This is in agreement with work showing Cx43 mediates TNT formation and mitochondrial transfer from human induced pluripotent stem cell-derived mesenchymal stem cells and mouse epithelial cells [[51]](https://paperpile.com/c/Ha8zXc/J8KF7). Cx43 has also been shown to regulate the amount of TNTs in normal human trabecular meshwork cells [[50]](https://paperpile.com/c/Ha8zXc/0LlgF). The fact that Cx43 seems to regulate TNTs in cancer cells is particularly interesting given the complex pro- and anti-tumorigenic roles of Cx43 in cancer [[3]](https://paperpile.com/c/Ha8zXc/qJBza). Strong evidence for such cooperation was shown by Osswald et al. [[40]](https://paperpile.com/c/Ha8zXc/QWlMJ), who demonstrated the presence of Cx43 in TNT-like structures termed tumor microtubes between glioma cells and astrocytes that facilitated tumor growth and therapy resistance. Notably, in recent years, Cx43 has been shown to facilitate metastasis, such as breast and lung carcinoma to the brain [[65]](https://paperpile.com/c/Ha8zXc/XkjSp), and the role of pro-tumorigenic TNTs in these settings needs further exploration.

The formation of TNTs is not fully understood and the molecular mechanism implicating Cx43 in this process is unknown. Using Cx43 WT and KO cells, we explored various signaling pathways that are known to both regulate Cx43 and be themselves regulated by Cx43. We identified several pathways that significantly affect TNT levels, notably PKA/cAMP, p38, ROCK, and FAK. An intricate inter-relationship between these signaling pathways and Cx43 appears to exist (Figure 7), although the main driving force for TNT formation in this setting remains to be defined.

**
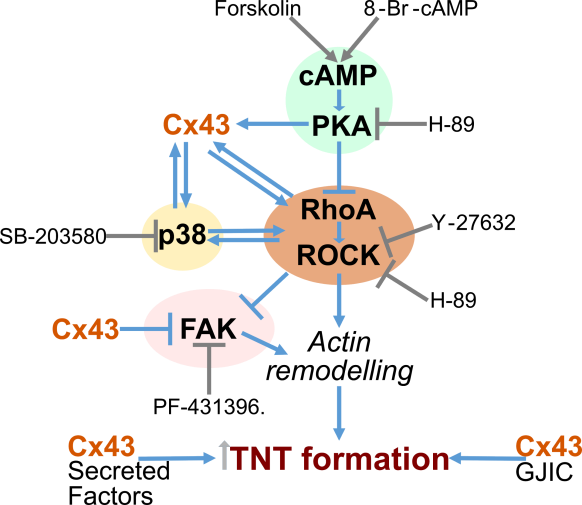
**

**Figure 7.** Cell signaling pathways and links to Cx43 and TNT formation.

The three canonical Rho-GTPases—RhoA, Rac1, and Cdc42—are key regulators of different cytoskeletal and adhesion dynamics in cells [[92]](https://paperpile.com/c/Ha8zXc/Wpkre). Critically, and consistent with our findings, RhoA-ROCK signaling regulates TNTs. For example, others have used the same ROCK inhibitor that we used (Y-27632) to demonstrate increased TNT formation and vesicle transfer via TNTs [[69,93,94]](https://paperpile.com/c/Ha8zXc/rlZQd+NLMV9+WRete). Mechanistically, it has been suggested that this inhibitor may lead to disassembly of F-actin stress fibers, thereby enriching the cellular pool of G-actin available for TNT formation [[69]](https://paperpile.com/c/Ha8zXc/NLMV9). RhoA surfaces as a candidate that induces TNTs in this setting, based on multiple reports, including ours, showing that ROCK inhibition stimulates TNTs, whereas formation of TNT-like protrusions seems to be significantly reduced with the inhibition of either Cdc42 or Rac1 [[70]](https://paperpile.com/c/Ha8zXc/9vrg7). The fact that activation of cAMP also stimulated TNTs was not surprising considering that cAMP, through PKA, phosphorylates and inhibits RhoA membrane translocation and ROCK signaling [[95]](https://paperpile.com/c/Ha8zXc/uhLLb).

A bidirectional relationship exists between Cx43 and the RhoA pathway. For example, RhoA regulates the permeability of Cx43 channels in myocytes [[73]](https://paperpile.com/c/Ha8zXc/mmmG2). Inhibition of ROCK increases the number of Cx43 gap junctions and GJIC in corneal epithelial cells [[96]](https://paperpile.com/c/Ha8zXc/2SfWF). It has been suggested that GJIC is reduced via RhoA-mediated Cx43 phosphorylation and Cx43/ZO-1/drebrin complex instability-mediated Cx43 degradation [[97]](https://paperpile.com/c/Ha8zXc/uDSts). Curiously, in prion-infected neurons, RhoA seems to interact with Cx43, with RhoA/ROCK inhibition blocking Cx43 hemichannel activity [[98]](https://paperpile.com/c/Ha8zXc/iDJj5). In agreement with this hypothesis, previous work strongly suggested that RhoA activation is a key player in thrombin-induced inhibition of Cx43 hemichannel activity [[74]](https://paperpile.com/c/Ha8zXc/Lhg2D). Increased F-actin induced by RhoA/ROCK signaling promotes the association between ZO-1 and Cx43, leading to endocytosis and reduced Cx43 expression [[72]](https://paperpile.com/c/Ha8zXc/exc4y). However, the potent stimulation of TNTs in Cx43 KO cells suggests that the regulation of TNTs by RhoA/ROCK is more direct and does not occur via Cx43 as a downstream target. Indeed, Cx43 regulates RhoA/ROCK activity. For example, upregulation of Cx43 expression can reduce NF-κB p65 nuclear translocation induced by RhoA/ROCK signaling [[72]](https://paperpile.com/c/Ha8zXc/exc4y). Cx43 knockdown also affects fibroblast cytoskeletal dynamics after scratch-wounding, with cells exhibiting longer lamellipodial protrusions lacking the F-actin belt and activation of Rac-1 and RhoA GTPases [[99]](https://paperpile.com/c/Ha8zXc/SvQck). A recent study directly linked Cx43 and the RhoA/ROCK pathway, thus providing an insight into the possible role of Cx43 in TNT formation. Fostok et al. [[71]](https://paperpile.com/c/Ha8zXc/RVSvi) found that Cx43 silencing is associated with ERK1/2 activation and upregulated the expression of all three main Rho-GTPases (RhoA, CDC42, and Rac1) in a non-malignant breast epithelial cell line. Our observation of increased RhoA in Hs578t cells is in line with this observation.

The stimulation of TNTs upon ROCK inhibition was even more potent in Cx43 KO cells. This was a surprising observation that also was seen upon inhibition of p38. These pathways are closely linked. RhoA-ROCK activates p38 [[75]](https://paperpile.com/c/Ha8zXc/5dswM) and activation of RhoA induces p38-dependent pseudopodial protrusions [[100]](https://paperpile.com/c/Ha8zXc/SKsmN). We used multiple breast cancer cell lines to show for the first time that p38 is a direct regulator of TNT formation. However, indirect targeting of p38, by blocking its upstream activator PAK1 with the drug IPA-3, inhibits TNT formation in a neuroblastoma cell line [[101]](https://paperpile.com/c/Ha8zXc/WqvdI). Moreover, the truncated form of Cx43 stimulates filopodia formation by activating p38 through phosphorylation of the upstream target PAK1, with filopodia formation significantly reduced via IPA-3 inhibition of PAK1 activity [[76]](https://paperpile.com/c/Ha8zXc/NnodH). However, the formation of filopodia and TNTs is stimulated through opposing pathways of the actin regulatory network, and the filopodia-promoting CDC42/IRSp53/VASP network negatively regulates TNT formation [[78]](https://paperpile.com/c/Ha8zXc/5TXdu). Our results are in agreement with this observation, with Cx43 KO cells forming significantly more TNTs in response to p38 inhibition compared with Cx43-expressing cells, which explains why p38 inhibition may reduce filopodia formation but induce TNTs in breast cancer cell lines. The role of PAK1 in this setting remains unclear because IPA-3 did not significantly affect TNT levels.

p38 induces stress fiber formation, which can be blocked by p38 inhibition [[102,103]](https://paperpile.com/c/Ha8zXc/Ztj6J+8WQBF). RhoA and FAK are also critical regulators of actin stress fibers [[104]](https://paperpile.com/c/Ha8zXc/YenZd). Moreover, improper alignment of actin stress fibers is observed in migrating fibroblasts derived from Cx43 KO mice [[105]](https://paperpile.com/c/Ha8zXc/OZECQ). Cx43 also inhibits FAK signaling and, perhaps not surprisingly considering the close links between FAK/RhoA/p38-signaling, inhibition of FAK signaling increases TNT levels. However, this finding does contrast with that of a study showing that FAK inhibition can reduce TNT levels in squamous cell carcinoma cells [[106]](https://paperpile.com/c/Ha8zXc/8GlSc). The frequent observation of the cell line-dependent regulation of TNTs further cements the idea that TNT formation is a highly complex process involving various cell context-dependent pathways.

A clear observation from the kinase inhibition experiments was that, although WT cells had more TNTs under basal conditions, KO cells responded more potently to the drugs and induced higher levels of TNTs than WT cells. The underlying reason is not clear, but one can speculate that, under basal conditions, Cx43 promotes the formation of TNTs (to maintain contact and synchrony in the cell population), whereas, upon stress, Cx43 can hinder the formation of new TNTs (to avoid the dissemination of negative signals and circumvent the damage). Indeed, these “kiss of life” and “kiss of death” phenomena are well-described for classic gap junctions mediating the bystander effect between adjacent cells, such as in cancer progression and the therapeutic response [[4,107]](https://paperpile.com/c/Ha8zXc/VV5xa+84pcw). The molecular mechanism controlling this aspect remains unclear, but a balance between multiple cell signaling pathways likely controls the overall fate of the cell in terms of TNT establishment.

It remains unclear whether channel-dependent or -independent mechanisms are the dominant Cx43-mediated pathways influencing TNTs. From the literature, multiple hypotheses can be postulated, including a role for the independently synthesized truncated forms of Cx43 in directly regulating the intracellular signaling pathways affecting TNTs. Our study supports this hypothesis. GJA1-20k arranges actin (maintaining F-actin structure) to guide Cx43 delivery [[15]](https://paperpile.com/c/Ha8zXc/nWiL4), as well as potentially that of other proteins involved in membrane dynamics. The Cx43/ZO-1 complex also regulates endothelial F-actin architecture [[108]](https://paperpile.com/c/Ha8zXc/Ul059). Expression of the truncated Cx43 form GJA1-20k did seem to induce TNTs in our KO cells, although additional experiments are needed to draw firm conclusions.

Apart from regulating the function of TNTs, GJIC may also regulate their formation. Indeed, inhibition of GJIC using chemical inhibitors suggested that fewer TNTs were formed, specifically in WT and not KO cells. However, these chemical inhibitors affect a number of other pathways that may influence TNTs, and our preliminary experiments using a more specific peptide-based approach to inhibit Cx43 channels did not prove fruitful. This issue might be deciphered by the use of other connexin species to restore GJIC. Moreover, it should be noted that formation of TNTs seems highly sensitive to cellular conditions, including time in tissue culture, seeding density, and duration of trypsinization and other factors that affect cell health. This variation can be appreciated in our study because individual biological replicates have been color-/shape-coded to allow tracing of trends between replicates and experiments performed on different days. Such variation reduces the statistical significance and reinforces the importance of maintaining the cellular conditions as similar as possible.

Finally, Cx43 affects the secretome [[89]](https://paperpile.com/c/Ha8zXc/Hjzn7), and our results clearly show that conditioned medium from Cx43 WT cells was a significantly more potent inducer of TNTs than that from KO cells. This suggests that Cx43 can affect TNTs in more distant cells as well as potentially in other cell types. This will be an exciting avenue to explore in the future. Notably, exosomes have been shown to stimulate TNT formation [[109]](https://paperpile.com/c/Ha8zXc/IQrbG). Silencing of RASSF1A inactivates the RhoB guanine nucleotide exchange factor GEF-H1, leading to Rab11 accumulation and subsequent exosome release, which in turn contribute to TNT formation [[110]](https://paperpile.com/c/Ha8zXc/3UXRj). An interaction between Cx43 and Rab11 has been described in endocytosis [[111]](https://paperpile.com/c/Ha8zXc/fj7hz), and vesicles containing Rab11 and Cx43 are transported between mitotic cells and adjacent cells via actin-based plasma membrane bridges [[52]](https://paperpile.com/c/Ha8zXc/k5mVI). A Rab11a–Rab8a cascade has been shown to regulate TNT formation through vesicle recycling [[112]](https://paperpile.com/c/Ha8zXc/U6EeU). Cx43 is a functional constituent of exosomes [[8,9]](https://paperpile.com/c/Ha8zXc/2L4NX+tabk7), and Cx43 phosphorylation may promote exosome release [[113]](https://paperpile.com/c/Ha8zXc/1SdpQ). The link between Cx43, exosomes, and TNTs warrants further investigation.

In conclusion, this work highlights a direct link between Cx43, TNTs, and cell signaling pathways that may play an important role in cancer progression and provides clues as to why Cx43 is often found to be pro-tumorigenic in highly malignant and metastatic cancers [[4]](https://paperpile.com/c/Ha8zXc/84pcw). Nonetheless, Cx43 is implicated in many other diseases [[2]](https://paperpile.com/c/Ha8zXc/hIZBR). Notably, Cx43 plays a central role in ischaemic heart disease, a condition recently described to impact TNT-mediated communication among cardiac cells [[114]](https://paperpile.com/c/Ha8zXc/5Eo91). Elucidation of the Cx43–TNT cell communication axis is thus an important future endeavor with potential therapeutic opportunities.

**4. Materials and Methods**

*4.1. Cx43 knockout and overexpression of Cx43 and GJA1-20k*

4.1.1. Generation of an all-in-one high-fidelity Cbh-hfCas9-2A-eGFP CRISPR plasmid

pSpCas9(BB)-2A-GFP (PX458), a gift from Feng Zhang (Addgene plasmid #48138; <http://n2t.net/addgene:48138>; RRID:Addgene_48138), allows the expression of CRISPR targeting sequences together with a GFP-linked form of Cas9 to control transfection and FACS selection [[66]](https://paperpile.com/c/Ha8zXc/yjuo7). To minimize putative off-target cleavage, we replaced Cas9 with a high-fidelity Cas9 gene [[67]](https://paperpile.com/c/Ha8zXc/A3JZf) amplified from the V-T7-humanSpCas9-HF1-NLS-3xFLAG (VP12) vector gifted by Keith Joung (Addgene plasmid #72247; <http://n2t.net/addgene:72247>; RRID:Addgene_72247). The hSpCas9 gene was removed by digesting the PX458 plasmid with FastDigest AgeI (Thermo Scientific; #ER1461) and FseI (New England Laboratories; #R0588S) in CutSmart® Buffer (New England Laboratories; #B7204S): the AgeI cut site is 1238 bp before the FLAG tag, whereas the FseI cut site is 5499 bp after the 2A-eGFP sequence. Primers (with AgeI and FseI restriction sites) were designed to amplify by conventional PCR the SpCas9 hf1 gene and also the T7, SV40 NLS, and FLAG tag sequences (Fw: 5’-GCACCGGTCG GCCGCTAATA CGACTCACTA TAG-3‘; Rev: 5’-CTAGGCCGGC CAATCCTGCA GCCTTGTCAT CGTCATC-3’). The reverse primer was designed to remove the stop codon to allow continuous in-frame translation of the self-cleaving eGFP present in the receptor vector. We used Phusion Hot Start High-Fidelity DNA Polymerase (2 U/μl) (New England Laboratories; #M0530L) under the recommended conditions and with the following PCR protocol: an activation step (98°C for 30 seconds), followed by 30 cycles of denaturation (98°C for 10 seconds), annealing (54°C for 30 seconds), and elongation (72°C for 65 seconds), with a final elongation step (72°C for 10 minutes). PCR amplification products were digested with FseI and AgeI and ligated into the digested PX458 using the T4 DNA Ligase System (Thermo Scientific). The new plasmid, named Cbh-hfCas9-2A-eGFP, was initially screened by KpnI and SalI double digestion and the final plasmid was sequenced using the T7 promoter primer (5’-TAATACGACT CACTATAGGG-3’) and a reverse EGFP N-terminal primer (5’-CGTCGCCGTC CAGCTCGACC AG-3’).

4.1.2. Cbh-hfCas9-2A-eGFP CRISPR system targeting Cx43

The gap junction protein alpha 1 (*GJA1*) gene sequence, encoding the Cx43 protein, was imported from the Ensembl Database (ENSG00000152661, GRCh38 [hg38, *Homo sapiens*]). Single small guide RNAs (sgRNAs) targeting the protein-encoding exon 2 region were designed using the publicly available tool Benchling (<https://benchling.com>), which predicts the 5'-NGG-3' protospacer adjacent motifs (PAMs) in a given sequence and the potential sgRNAs in both strands, giving their on-target and off-target scores. We choose 20-nucleotide-long sgRNAs with acceptable on-target and off-target scores, ensuring that the guides did not contain a BbsI restriction site. The sequences were as follows: Pair 1, 5’-CACCGAAGCC TACTCAACTG CTGG-3’/5’-AAACTCCAGC AGTTGAGTAG GCTTC-3’; Pair 2, 5’-CACCGACAGC GGTTGAGTCA GCCTG-3’/5’-AAACCAGGCT GACTCAACCG CTGTC-3’.

The sgRNA oligo duplex was generated using 0.5 μl of T4 Polynuclease Kinase (10 U/μl) (Thermo Scientific; #EK0031), 1 μl of 10× T4 Ligase Buffer (Thermo Scientific; #B69), 10 μM of forward sgRNA oligo, 10 μM of reverse sgRNA oligo, and 6.5 μl of nuclease-free water. Phosphorylation and annealing involved an initial step of 30 minutes at 37°C, followed by 5 minutes at 95°C and a 5°C/minute decrease until 25°C. For cloning, the Cbh-hfCas9-2A-eGFP vector was digested with BbsI, which generated compatible ends with the BbsI-specific overhangs of the sgRNA oligo duplex. The reaction comprised 100 ng of Cbh-hfCas9-2A-eGFP, 1 μl of BbsI (10 U/μl) (Thermo Scientific; #ER1011), 0.5 μl of T4 Ligase (1 U/μl) (Invitrogen, Thermo Scientific; #15224090), 2 μl of 10× Tango Buffer (Thermo Scientific; #BY5), 0.1 μM of the annealed and phosphorylated sgRNA oligo duplex, 0.5 mM of DTT and ATP, and nuclease-free water to a total volume of 20 μl. Six 10-minute cycles (5 minutes at 37°C, then 5 minutes at 21°C) were followed by a 10-minute heat-inactivation step at 65°C. DH5α *E. coli* cells were transformed with standard procedures and plasmid isolation was performed using the commercial GeneJET Plasmid Miniprep kit (Thermo Scientific; #K0502). Colonies were screened with SalI + BbsI double digest and positive clones were verified by sequencing from the U6 promoter (5’-ACTATCATAT GCTTACCGTA AC-3’).

4.1.3. Generation of KO clones

Cells were transfected with Lipofectamine 3000 (Thermo Scientific; #L3000015) following the manufacturer’s instructions. Seventy-two hours later, the cells were sorted (BD FACSAria II cell sorter [BD Biosciences]) and seeded at 1 cell/well in 96-well plates previously prepared with 150 μl of conditioned medium per well (50% normal medium + 50% conditioned medium). Clones were screened for Cx43 expression by western blot and immunofluorescence imaging.

4.1.4. Overexpression of Cx43 and GJA1-20k

Cx43-IRES-GFP in the retroviral pLPCX vector (Clontech) has been previously described [[10]](https://paperpile.com/c/Ha8zXc/Yq1H3) and is available as Addgene plasmid #65433. GJA1-20k was cloned from pDEST-EGFP-Cx43-ML-N1 (Addgene plasmid #49860; <http://n2t.net/addgene:49860>; RRID:Addgene_49860) as a template into pEGFP-N2 (Clontech) plasmid by PCR cloning (FW-XhoI: 5’-GCGCTCGAGA TGCTGGTGGT GTCCTTGGTG TCC-3’; and Rv-HindIII: 5’-GCGAAGCTTC TAGATCTCCA GGTCATCAGG CCG-3’) and digested with XhoI and NotI into the pLPCX vector and verified by sequencing. Transfection, viral collection, and infection were performed as previously described [[115]](https://paperpile.com/c/Ha8zXc/sggP6). Cells were sorted by flow cytometry (High Speed Cell Sorter FacsAria [Becton Dickinson]) to obtain a population entirely comprising GFP-positive cells.

*4.2. Cell culture*

Human cancer cells Hs578t, BT-549, and SUM159PT (American Type Culture Collection) were grown in standard Dulbecco’s modified Eagle’s medium (DMEM) (Thermo Scientific) supplemented with 10% (v/v) heat-inactivated fetal bovine serum (FBS) (Labclinics, Barcelona, Spain) and penicillin (100 U/mL)–streptomycin (100 U/mL) (Thermo Fisher Scientific) in a humidified incubator (37.0°C, 5% CO2). Hs578t cells were additionally supplemented with human insulin (10 µg/ml) (Sigma-Aldrich, Deisenhoffen, Germany) to support growth.

*4.3. TNT analysis*

Cells (75,000) were seeded into 6-well plates. Unless otherwise stated, the medium was replaced the following day with either normal DMEM medium, low-serum DMEM (1% FBS), or drug-/peptide-supplemented DMEM. After overnight incubation, images were then taken with a Nikon Eclipse TE2000-S inverted microscope at 10× magnification. Between 5 and 10 images were obtained for each condition in each independent experiment and the numbers of cells and TNTs were counted to calculate the ratio of TNTs/cell.

*4.4. Drug treatments*

Hs578t WT and KO cells (75,000 cells/well) were seeded in a 6-well plate. Drugs were applied and the cells incubated overnight (16 hours) or for 8 hours (for carbenoxolone, PF 431396, IPA-3, and latrunculin A). The final concentrations of the drugs were as follows: meclofenamate sodium (Chem Cruz; #sc200532A) 25 µM; forskolin (Sigma-Aldrich; #F6886), 30 µM; latrunculin A (Tocris; #3973), 10 nM; SB203580 (Selleckchem; #S1076), 25 µM; carbenoxolone (Sigma-Aldrich; #C4790), 25 µM; Y-27632 (Selleckchem; #S1049), 10 µM; IPA-3 (Selleckchem; #S7093), 2.5 µM; 8-Br-cAMP (Abcam; #ab141448), 100 µM; H89 dihydrochloride (Sigma-Aldrich; #C4790), 20 µM; and PF 431396 (Tocris; #4278), 5 µM.

*4.5. Peptide treatments*

All peptides were custom-synthesized by GeneScript to a minimum purity of 85% and shipped as a lyophilized powder. The peptides were resuspended in sterile 1× PBS or DMSO and added to media at 25 µmol/L. The cells were incubated overnight. The next morning, 10 random photomicrographs were taken and the TNT/cell ratio was calculated. All peptides were screened twice, with the exception of Tat-Cx43 (amino acids 266–283), for which four independent experiments were performed. The following peptides were tested: TAT-Cx43(266–283), YGRKKRRQRR RAYFNGCSSP TAPLSPMSP; TAT-Cx43(274–291), YGRKKRRQRR RPTAPLSPMS PPGYKLVTG; TAT-Cx43(266–283REV), YGRKKRRQRR RAPSMPSLPA TPSSCGY; ACT1 RQPKIWFPNR RKPWKKRPRP DDLEI; ACT1R, RQPKIWFPNR RKPWKKIELD DPRPR; Peptide5, VDCFLSRPTK T; CT10, SRPRPDEI; Gap27, SRPTEKTIII; and Gap27rev, IIFITKETPS.

*4.6. Conditioned medium treatment*

WT or KO Hs578t cells (500,000 cells) were seeded in 100-mm cell culture dishes and cultured for 4 days. Conditioned media were collected and filtered through a 0.2-µm filter to ensure sterility. Three wells of WT cells and three of KO cells were seeded in a 6-well plate at 75,000 cells/well. The cells were allowed to grow for 24 hours. Afterward, the media was aspirated, the wells washed with 2 mL of 1× PBS, and the medium of each well replaced with complete DMEM (control), conditioned medium from WT cells (CM-WT), or conditioned medium from KO cells (CM-KO). The cells were incubated overnight before the TNT numbers were quantified.

*4.7. Protein extraction and quantification*

Cells were lysed with RIPA Lysis Buffer (50 mM Tris-HCl, pH 7.4, 150 mM NaCl, 1% Triton X-100, 1% sodium deoxycholate, 0.1% SDS, 1 mM EDTA) (Santa Cruz Biotechnology, USA) supplemented with PhosSTOP and Complete Phosphatase/Protease Inhibitor Cocktails (Roche Diagnostics GmbH, Germany). Protein was quantified using the Pierce BCA Protein Assay Kit (Thermo Fisher Scientific).

*4.8. Western blotting*

Complete protein extracts (30 µg) were loaded onto SDS-PAGE gels and electrophoretically transferred to polyvinylidene fluoride (PVDF) membranes (Thermo Fisher Scientific). The membranes were then blocked with either 5% (w/v) non-fat dry milk or 5% (w/v) bovine serum albumin (BSA) (Sigma-Aldrich) in phosphate-buffered saline buffer containing 0.1% Tween-20 (Sigma-Aldrich) and incubated with primary antibody overnight at 4°C. HRP-conjugated secondary antibody incubation was performed at room temperature for 1 hour. Protein immunodetection was performed using ECL™ Western Blotting Detection Reagents (GE Healthcare, Buckinghamshire, UK). The following primary antibodies were used: Cx43 (Sigma-Aldrich; #C6219; 1:8000), vinculin (Sigma-Aldrich; #V4505; 1:1000), ROCK1 (Santa Cruz Biotechnologies; #sc-17794; 1:100), ezrin (Santa Cruz Biotechnologies; #sc-5875; 1:1000), vimentin (Santa Cruz Biotechnologies; #sc-6260; 1:1000), and RhoA (Cytoskeleton Inc., Denver, CO, USA; #ARH03; 1:1000). The secondary antibodies were rabbit anti-mouse horseradish peroxidase and goat anti-rabbit horseradish peroxidase (Life Technologies; 1:10000).

*4.9. Immunofluorescence microscopy*

Cells were seeded on sterile glass coverslips (20,000 cells/coverslip) and grown to semi-confluency. After 28–48 hours, they were washed once with 1× PBS and fixed with 4% formaldehyde for 15 minutes at room temperature. After two additional washes, the cells were permeabilized and blocked in PBS containing 20% goat serum and 0.5% Triton X-100 for 1 hour at RT. Afterward, the cells were stained with the ActinRed™ 555 ReadyProbes® Reagent (Thermo Fisher Scientific; #R37112), following the steps given by the manufacturer. From this step onward, we protected the dish from direct light. The cells were then incubated for 1 hour at room temperature with a rabbit anti-Cx43 antibody (Sigma; #C6219) diluted 1:500 in antibody buffer (1× PBS containing 5% goat serum). Cells were washed three times with 1× PBS and incubated for 1 hour at room temperature with secondary antibody (Alexa Fluor® 488 goat anti-rabbit [Sigma-Aldrich] diluted at 1:1000 in antibody buffer). The cells were then washed three times with PBS and mounted by placing the coverslips cell-side down on glass slides with a drop of ProLong Diamond Antifade Mountant containing DAPI (Life Technologies; #P36962) to automatically stain the nuclei. Samples were stored at 4°C in the dark until analysis. Finally, samples were observed using an Olympus FSX100 fluorescent microscope or confocal microscope Olympus FV1000 as indicated.

*4.10. F-actin/G-actin ratio determination*

Cells (70,000) were seeded in 24-well culture dishes. The cells were cultured in DMEM containing 10% or 1% FBS overnight for cells undergoing non-stimulated or stimulated conditions, respectively. The next day, the 1% FBS-DMEM was replaced with normal 10% FBS-DMEM for 3 hours to stimulate the cells. This was followed by fixation of the cells in 4% paraformaldehyde for 15 minutes at room temperature, permeabilization in 0.5% Triton X-100 for 5 minutes, and PBS rinsing. An incubation solution of 2 drops/ml ActinRed 555 (Life Technologies) to stain F-actin and 10 μg/ml Alexa Fluor 488-labeled DNAseI (Life Technologies) to stain monomeric G-actin was added to the cells for 1 hour. After three washing steps with PBS, images of the F-/G-actin expression were obtained using an Olympus FSX100 inverted microscope at 5× magnification. The relative ratio of F-/G-actin fluorescence intensity was determined using ImageJ.

*4.11. Parachute assay*

Cells at 70%–90% confluency were prelabeled in DMEM containing 10 µg/ml DiI (C18) (a red fluorescent long-chain dialkylcarbocyanine tracer dye), 5 µg/ml calcein AM (a green fluorescent probe that can pass through gap junctions), and 2.5 mM probenecid or 10 µM verapamil (an anion transport inhibitor that minimizes calcein leakage from cells). After 30-minute incubation at 37°C, the cells were trypsinized and sparsely seeded (1:25 to 1:50) into wells containing 50%–70% confluent unlabelled cells. After 4 hours of co-culture, all cells were trypsinized and cell fluorescence was measured by flow cytometry. Transfer of calcein AM from the prelabeled cells to recipient cells via gap junctions can be detected, whereas the red fluorescent DiI remains in the donor cell.

*4.12. Statistical analysis*

All statistical analyses were performed with GraphPad Prism version 8. Data were tested for normality using the Shapiro‐Wilk test. Comparisons of two groups of parametric data were performed with Student's t‐test, whereas multiple groups were analyzed by one‐way ANOVA using Tukey’s post-hoc test. Statistical significance was set at p < .05. All data are displayed as mean ± SEM.

**5. Conclusions**

Previous work demonstrated the presence of Cx43 in TNTs and that it potentially regulated the passage of small molecules between cells through gap junctions. However, TNTs are generally thought to transfer much larger proteins and organelles, which would not be compatible with the small size limit of gap junctions of around 1.2 kDa. This work identified Cx43 as a direct regulator of TNT formation. We also established several key pathways linked to Cx43, including p38, PKA signaling, ROCK signaling, and FAK signaling, which regulate TNTs in a Cx43-dependent manner. Elucidation of the role of Cx43 in TNTs brings conceptual advances linking Cx43 to pro-tumorigenicity. A better understanding of TNT formation could provide a novel avenue for cancer targeting.

**Supplementary Materials:** The following are available online at www.mdpi.com/xxx/s1, Figure S1: title, Table S1: title, Video S1: title.

**Author Contributions:** Conceptualization, T.A.; Coordination, T.A.; methodology, T.A., L.V.B., D.D.A., and A.T.; software, none; validation, T.A., A.T., D.D.A., and L.V.B.; formal analysis, T.A., A.T., D.D.A., L.V.B., and C.P.; investigation, T.A., A.T., D.D.A., L.V.B., M.J.M., P.A.J., H.G., and C.P.; resources, T.A. and S.R.C.; data curation, T.A.; writing—original draft preparation, T.A.; writing—review and editing, T.A., A.T., D.D.A., L.V.B., M.J.M., and H.G.; visualization, T.A., A.T., D.D.A., and L.V.B.; supervision, T.A.; project administration, T.A.; funding acquisition, T.A. All authors read and approved the manuscript.

**Funding:** T.A. acknowledges funding from *Fundación Científica Asociación Española Contra el Cáncer* (IDEAS SEMILLA AECC 2020) and *Instituto de Salud Carlos III*, grants PI16/00772 and CPII16/00042 co-financed by the European Regional Development Fund (ERDF) and *Instituto de Salud Carlos III*, grants PI16/00772. The APC was funded by *Instituto de Salud Carlos III* grant PI16/00772 co-financed by the European Regional Development Fund (ERDF).

**Acknowledgments:** We would like to thank past and present lab members, particularly Dr Marta Sesé and Dr Javier Hernández Losa, for their input and help with this project. pDEST-EGFP-Cx43ML-N1 was a gift from Robin Shaw (Addgene plasmid #49860; <http://n2t.net/addgene:49860>; RRID:Addgene_49860). pSpCas9(BB)-2A-GFP (PX458) was a gift from Feng Zhang (Addgene plasmid #48138; <http://n2t.net/addgene:48138>; RRID:Addgene_48138). VP12 was a gift from Keith Joung (Addgene plasmid #72247; <http://n2t.net/addgene:72247>; RRID:Addgene_72247).

**Conflicts of Interest:** The authors declare no conflict of interest. The funders had no role in the design of the study; in the collection, analyses, or interpretation of data; in the writing of the manuscript, or in the decision to publish the results.

**References**

1. [Aasen, T.; Johnstone, S.; Vidal-Brime, L.; Lynn, K.S.; Koval, M. Connexins: Synthesis, Post-Translational Modifications, and Trafficking in Health and Disease. *Int. J. Mol. Sci.* **2018**, *19*, doi:](http://paperpile.com/b/Ha8zXc/I6VGK)[10.3390/ijms19051296](http://dx.doi.org/10.3390/ijms19051296)[.](http://paperpile.com/b/Ha8zXc/I6VGK)

2. [Delmar, M.; Laird, D.W.; Naus, C.C.; Nielsen, M.S.; Verselis, V.K.; White, T.W. Connexins and Disease. *Cold Spring Harb. Perspect. Biol.* **2018**, *10*, doi:](http://paperpile.com/b/Ha8zXc/hIZBR)[10.1101/cshperspect.a029348](http://dx.doi.org/10.1101/cshperspect.a029348)[.](http://paperpile.com/b/Ha8zXc/hIZBR)

3. [Aasen, T.; Mesnil, M.; Naus, C.C.; Lampe, P.D.; Laird, D.W. Gap junctions and cancer: communicating for 50 years. *Nat. Rev. Cancer* **2016**, *16*, 775–788.](http://paperpile.com/b/Ha8zXc/qJBza)

4. [Aasen, T.; Leithe, E.; Graham, S.V.; Kameritsch, P.; Mayán, M.D.; Mesnil, M.; Pogoda, K.; Tabernero, A. Connexins in cancer: bridging the gap to the clinic. *Oncogene* **2019**, *38*, 4429–4451.](http://paperpile.com/b/Ha8zXc/84pcw)

5. [Mesnil, M.; Aasen, T.; Boucher, J.; Chépied, A.; Cronier, L.; Defamie, N.; Kameritsch, P.; Laird, D.W.; Lampe, P.D.; Lathia, J.D.; et al. An update on minding the gap in cancer. *Biochim. Biophys. Acta Biomembr.* **2018**, *1860*, 237–243.](http://paperpile.com/b/Ha8zXc/kSa0x)

6. [Leithe, E.; Mesnil, M.; Aasen, T. The connexin 43 C-terminus: A tail of many tales. *Biochim. Biophys. Acta Biomembr.* **2018**, *1860*, 48–64.](http://paperpile.com/b/Ha8zXc/fu5Nj)

7. [Martins-Marques, T.; Ribeiro-Rodrigues, T.; Batista-Almeida, D.; Aasen, T.; Kwak, B.R.; Girao, H. Biological Functions of Connexin43 Beyond Intercellular Communication. *Trends in Cell Biology* 2019, *29*, 835–847.](http://paperpile.com/b/Ha8zXc/mnqvx)

8. [Soares, A.R.; Martins-Marques, T.; Ribeiro-Rodrigues, T.; Ferreira, J.V.; Catarino, S.; Pinho, M.J.; Zuzarte, M.; Isabel Anjo, S.; Manadas, B.; P G Sluijter, J.; et al. Gap junctional protein Cx43 is involved in the communication between extracellular vesicles and mammalian cells. *Sci. Rep.* **2015**, *5*, 13243.](http://paperpile.com/b/Ha8zXc/2L4NX)

9. [Martins-Marques, T.; Pinho, M.J.; Zuzarte, M.; Oliveira, C.; Pereira, P.; Sluijter, J.P.G.; Gomes, C.; Girao, H. Presence of Cx43 in extracellular vesicles reduces the cardiotoxicity of the anti-tumour therapeutic approach with doxorubicin. *J Extracell Vesicles* **2016**, *5*, 32538.](http://paperpile.com/b/Ha8zXc/tabk7)

10. [Salat-Canela, C.; Sesé, M.; Peula, C.; Ramón y Cajal, S.; Aasen, T. Internal translation of the connexin 43 transcript. *Cell Commun. Signal.* **2014**, *12*, 31.](http://paperpile.com/b/Ha8zXc/Yq1H3)

11. [Smyth, J.W.; Shaw, R.M. Autoregulation of connexin43 gap junction formation by internally translated isoforms. *Cell Rep.* **2013**, *5*, 611–618.](http://paperpile.com/b/Ha8zXc/eP3mz)

12. [Ul-Hussain, M.; Olk, S.; Schoenebeck, B.; Wasielewski, B.; Meier, C.; Prochnow, N.; May, C.; Galozzi, S.; Marcus, K.; Zoidl, G.; et al. Internal ribosomal entry site (IRES) activity generates endogenous carboxyl-terminal domains of Cx43 and is responsive to hypoxic conditions. *J. Biol. Chem.* **2014**, *289*, 20979–20990.](http://paperpile.com/b/Ha8zXc/5dESn)

13. [Basheer, W.A.; Fu, Y.; Shimura, D.; Xiao, S.; Agvanian, S.; Hernandez, D.M.; Hitzeman, T.C.; Hong, T.; Shaw, R.M. Stress response protein GJA1-20k promotes mitochondrial biogenesis, metabolic quiescence, and cardioprotection against ischemia/reperfusion injury. *JCI Insight* **2018**, *3*, doi:](http://paperpile.com/b/Ha8zXc/FWLI6)[10.1172/jci.insight.121900](http://dx.doi.org/10.1172/jci.insight.121900)[.](http://paperpile.com/b/Ha8zXc/FWLI6)

14. [Fu, Y.; Zhang, S.-S.; Xiao, S.; Basheer, W.A.; Baum, R.; Epifantseva, I.; Hong, T.; Shaw, R.M. Cx43 Isoform GJA1-20k Promotes Microtubule Dependent Mitochondrial Transport. *Front. Physiol.* **2017**, *8*, 905.](http://paperpile.com/b/Ha8zXc/mmkGm)

15. [Basheer, W.A.; Xiao, S.; Epifantseva, I.; Fu, Y.; Kleber, A.G.; Hong, T.; Shaw, R.M. GJA1-20k Arranges Actin to Guide Cx43 Delivery to Cardiac Intercalated Discs. *Circ. Res.* **2017**, *121*, 1069–1080.](http://paperpile.com/b/Ha8zXc/nWiL4)

16. [Chen, W.; Zheng, P.; Hong, T.; Wang, Y.; Liu, N.; He, B.; Zou, S.; Ren, D.; Duan, J.; Zhao, L.; et al. Astrocytes-derived exosomes induce neuronal recovery after traumatic brain injury via delivering gap junction alpha 1-20 k. *J. Tissue Eng. Regen. Med.* **2019**, doi:](http://paperpile.com/b/Ha8zXc/R24MF)[10.1002/term.3002](http://dx.doi.org/10.1002/term.3002)[.](http://paperpile.com/b/Ha8zXc/R24MF)

17. [Kotini, M.; Barriga, E.H.; Leslie, J.; Gentzel, M.; Rauschenberger, V.; Schambony, A.; Mayor, R. Gap junction protein Connexin-43 is a direct transcriptional regulator of N-cadherin in vivo. *Nat. Commun.* **2018**, *9*, 3846.](http://paperpile.com/b/Ha8zXc/teraK)

18. [Laird, D.W.; Lampe, P.D. Therapeutic strategies targeting connexins. *Nat. Rev. Drug Discov.* **2018**, *17*, 905–921.](http://paperpile.com/b/Ha8zXc/hP1CJ)

19. [Rustom, A.; Saffrich, R.; Markovic, I.; Walther, P.; Gerdes, H.-H. Nanotubular highways for intercellular organelle transport. *Science* **2004**, *303*, 1007–1010.](http://paperpile.com/b/Ha8zXc/6gLSW)

20. [Ariazi, J.; Benowitz, A.; De Biasi, V.; Den Boer, M.L.; Cherqui, S.; Cui, H.; Douillet, N.; Eugenin, E.A.; Favre, D.; Goodman, S.; et al. Tunneling Nanotubes and Gap Junctions-Their Role in Long-Range Intercellular Communication during Development, Health, and Disease Conditions. *Front. Mol. Neurosci.* **2017**, *10*, 333.](http://paperpile.com/b/Ha8zXc/kRUO5)

21. [Mittal, R.; Karhu, E.; Wang, J.-S.; Delgado, S.; Zukerman, R.; Mittal, J.; Jhaveri, V.M. Cell communication by tunneling nanotubes: Implications in disease and therapeutic applications. *J. Cell. Physiol.* **2019**, *234*, 1130–1146.](http://paperpile.com/b/Ha8zXc/Maa5t)

22. [Watkins, S.C.; Salter, R.D. Functional connectivity between immune cells mediated by tunneling nanotubules. *Immunity* **2005**, *23*, 309–318.](http://paperpile.com/b/Ha8zXc/g3fY5)

23. [Thayanithy, V.; Dickson, E.L.; Steer, C.; Subramanian, S.; Lou, E. Tumor-stromal cross talk: direct cell-to-cell transfer of oncogenic microRNAs via tunneling nanotubes. *Transl. Res.* **2014**, *164*, 359–365.](http://paperpile.com/b/Ha8zXc/RSm2s)

24. [Biran, A.; Perelmutter, M.; Gal, H.; Burton, D.G.A.; Ovadya, Y.; Vadai, E.; Geiger, T.; Krizhanovsky, V. Senescent cells communicate via intercellular protein transfer. *Genes Dev.* **2015**, *29*, 791–802.](http://paperpile.com/b/Ha8zXc/hVnG2)

25. [Zhu, S.; Victoria, G.S.; Marzo, L.; Ghosh, R.; Zurzolo, C. Prion aggregates transfer through tunneling nanotubes in endocytic vesicles. *Prion* **2015**, *9*, 125–135.](http://paperpile.com/b/Ha8zXc/IvpY0)

26. [Gousset, K.; Schiff, E.; Langevin, C.; Marijanovic, Z.; Caputo, A.; Browman, D.T.; Chenouard, N.; de Chaumont, F.; Martino, A.; Enninga, J.; et al. Prions hijack tunnelling nanotubes for intercellular spread. *Nat. Cell Biol.* **2009**, *11*, 328–336.](http://paperpile.com/b/Ha8zXc/QwXRx)

27. [Abounit, S.; Wu, J.W.; Duff, K.; Victoria, G.S.; Zurzolo, C. Tunneling nanotubes: A possible highway in the spreading of tau and other prion-like proteins in neurodegenerative diseases. *Prion* **2016**, *10*, 344–351.](http://paperpile.com/b/Ha8zXc/kOoOR)

28. [Eugenin, E.A.; Gaskill, P.J.; Berman, J.W. Tunneling nanotubes (TNT) are induced by HIV-infection of macrophages: a potential mechanism for intercellular HIV trafficking. *Cell. Immunol.* **2009**, *254*, 142–148.](http://paperpile.com/b/Ha8zXc/J8ay3)

29. [Jansens, R.J.J.; Tishchenko, A.; Favoreel, H.W. Bridging the Gap: Virus Long-Distance Spread via Tunneling Nanotubes. *J. Virol.* **2020**, *94*, doi:](http://paperpile.com/b/Ha8zXc/ypYEm)[10.1128/JVI.02120-19](http://dx.doi.org/10.1128/JVI.02120-19)[.](http://paperpile.com/b/Ha8zXc/ypYEm)

30. [Kim, B.-W.; Lee, J.-S.; Ko, Y.-G. Mycoplasma exploits mammalian tunneling nanotubes for cell-to-cell dissemination. *BMB Rep.* **2019**, *52*, 490–495.](http://paperpile.com/b/Ha8zXc/op4XY)

31. [Wang, Y.; Cui, J.; Sun, X.; Zhang, Y. Tunneling-nanotube development in astrocytes depends on p53 activation. *Cell Death Differ.* **2011**, *18*, 732–742.](http://paperpile.com/b/Ha8zXc/ZkCC6)

32. [Koyanagi, M.; Brandes, R.P.; Haendeler, J.; Zeiher, A.M.; Dimmeler, S. Cell-to-cell connection of endothelial progenitor cells with cardiac myocytes by nanotubes: a novel mechanism for cell fate changes? *Circ. Res.* **2005**, *96*, 1039–1041.](http://paperpile.com/b/Ha8zXc/WlCON)

33. [Onfelt, B.; Nedvetzki, S.; Benninger, R.K.P.; Purbhoo, M.A.; Sowinski, S.; Hume, A.N.; Seabra, M.C.; Neil, M.A.A.; French, P.M.W.; Davis, D.M. Structurally distinct membrane nanotubes between human macrophages support long-distance vesicular traffic or surfing of bacteria. *J. Immunol.* **2006**, *177*, 8476–8483.](http://paperpile.com/b/Ha8zXc/tDYh8)

34. [Austefjord, M.W.; Gerdes, H.-H.; Wang, X. Tunneling nanotubes: Diversity in morphology and structure. *Commun. Integr. Biol.* **2014**, *7*, e27934.](http://paperpile.com/b/Ha8zXc/TmibX)

35. [Onfelt, B.; Nedvetzki, S.; Yanagi, K.; Davis, D.M. Cutting edge: Membrane nanotubes connect immune cells. *J. Immunol.* **2004**, *173*, 1511–1513.](http://paperpile.com/b/Ha8zXc/b8hla)

36. [Osswald, M.; Jung, E.; Wick, W.; Winkler, F. Tunneling nanotube‐like structures in brain tumors. *Cancer Rep.* **2019**, *2*, 1.](http://paperpile.com/b/Ha8zXc/Glud1)

37. [Matejka, N.; Reindl, J. Perspectives of cellular communication through tunneling nanotubes in cancer cells and the connection to radiation effects. *Radiat. Oncol.* **2019**, *14*, 218.](http://paperpile.com/b/Ha8zXc/wZw4z)

38. [Roehlecke, C.; Schmidt, M.H.H. Tunneling Nanotubes and Tumor Microtubes in Cancer. *Cancers*  **2020**, *12*, doi:](http://paperpile.com/b/Ha8zXc/3zSpW)[10.3390/cancers12040857](http://dx.doi.org/10.3390/cancers12040857)[.](http://paperpile.com/b/Ha8zXc/3zSpW)

39. [Lou, E.; Fujisawa, S.; Morozov, A.; Barlas, A.; Romin, Y.; Dogan, Y.; Gholami, S.; Moreira, A.L.; Manova-Todorova, K.; Moore, M.A.S. Tunneling nanotubes provide a unique conduit for intercellular transfer of cellular contents in human malignant pleural mesothelioma. *PLoS One* **2012**, *7*, e33093.](http://paperpile.com/b/Ha8zXc/WZ3Ey)

40. [Osswald, M.; Jung, E.; Sahm, F.; Solecki, G.; Venkataramani, V.; Blaes, J.; Weil, S.; Horstmann, H.; Wiestler, B.; Syed, M.; et al. Brain tumour cells interconnect to a functional and resistant network. *Nature* **2015**, *528*, 93–98.](http://paperpile.com/b/Ha8zXc/QWlMJ)

41. [Desir, S.; O’Hare, P.; Vogel, R.I.; Sperduto, W.; Sarkari, A.; Dickson, E.L.; Wong, P.; Nelson, A.C.; Fong, Y.; Steer, C.J.; et al. Chemotherapy-Induced Tunneling Nanotubes Mediate Intercellular Drug Efflux in Pancreatic Cancer. *Sci. Rep.* **2018**, *8*, 9484.](http://paperpile.com/b/Ha8zXc/vCIVG)

42. [Lou, E. Intercellular conduits in tumours: the new social network. *Trends Cancer Res.* **2016**, *2*, 3–5.](http://paperpile.com/b/Ha8zXc/qDkJw)

43. [Sahu, P.; Jena, S.R.; Samanta, L. Tunneling Nanotubes: A Versatile Target for Cancer Therapy. *Curr. Cancer Drug Targets* **2018**, *18*, 514–521.](http://paperpile.com/b/Ha8zXc/bkODk)

44. [Valdebenito, S.; Lou, E.; Baldoni, J.; Okafo, G.; Eugenin, E. The Novel Roles of Connexin Channels and Tunneling Nanotubes in Cancer Pathogenesis. *Int. J. Mol. Sci.* **2018**, *19*, doi:](http://paperpile.com/b/Ha8zXc/BagYX)[10.3390/ijms19051270](http://dx.doi.org/10.3390/ijms19051270)[.](http://paperpile.com/b/Ha8zXc/BagYX)

45. [Weil, S.; Osswald, M.; Solecki, G.; Grosch, J.; Jung, E.; Lemke, D.; Ratliff, M.; Hänggi, D.; Wick, W.; Winkler, F. Tumor microtubes convey resistance to surgical lesions and chemotherapy in gliomas. *Neuro. Oncol.* **2017**, *19*, 1316–1326.](http://paperpile.com/b/Ha8zXc/NwWno)

46. [Wang, X.; Veruki, M.L.; Bukoreshtliev, N.V.; Hartveit, E.; Gerdes, H.-H. Animal cells connected by nanotubes can be electrically coupled through interposed gap-junction channels. *Proc. Natl. Acad. Sci. U. S. A.* **2010**, *107*, 17194–17199.](http://paperpile.com/b/Ha8zXc/ZM62u)

47. [Ribeiro-Rodrigues, T.M.; Martins-Marques, T.; Morel, S.; Kwak, B.R.; Girão, H. Role of connexin 43 in different forms of intercellular communication – gap junctions, extracellular vesicles and tunnelling nanotubes. *Journal of Cell Science* 2017, *130*, 3619–3630.](http://paperpile.com/b/Ha8zXc/GTOk0)

48. [Lock, J.T.; Parker, I.; Smith, I.F. Communication of Ca(2+) signals via tunneling membrane nanotubes is mediated by transmission of inositol trisphosphate through gap junctions. *Cell Calcium* **2016**, *60*, 266–272.](http://paperpile.com/b/Ha8zXc/IEyjX)

49. [Okafo, G.; Prevedel, L.; Eugenin, E. Tunneling nanotubes (TNT) mediate long-range gap junctional communication: Implications for HIV cell to cell spread. *Sci. Rep.* **2017**, *7*, 16660.](http://paperpile.com/b/Ha8zXc/8FXn5)

50. [Li, X. Gap junction protein connexin43 and tunneling nanotubes in human trabecular meshwork cells. *Int. J. Physiol. Pathophysiol. Pharmacol.* **2019**, *11*, 212–219.](http://paperpile.com/b/Ha8zXc/0LlgF)

51. [Yao, Y.; Fan, X.-L.; Jiang, D.; Zhang, Y.; Li, X.; Xu, Z.-B.; Fang, S.-B.; Chiu, S.; Tse, H.-F.; Lian, Q.; et al. Connexin 43-Mediated Mitochondrial Transfer of iPSC-MSCs Alleviates Asthma Inflammation. *Stem Cell Reports* **2018**, *11*, 1120–1135.](http://paperpile.com/b/Ha8zXc/J8KF7)

52. [Fykerud, T.A.; Knudsen, L.M.; Totland, M.Z.; Sørensen, V.; Dahal-Koirala, S.; Lothe, R.A.; Brech, A.; Leithe, E. Mitotic cells form actin-based bridges with adjacent cells to provide intercellular communication during rounding. *Cell Cycle* **2016**, *15*, 2943–2957.](http://paperpile.com/b/Ha8zXc/k5mVI)

53. [Activating, A. Brain Tumors Feed off Healthy Neurons. *Nature* **2019**, *573*, 539–545.](http://paperpile.com/b/Ha8zXc/23YVR)

54. [Zeng, Q.; Michael, I.P.; Zhang, P.; Saghafinia, S.; Knott, G.; Jiao, W.; McCabe, B.D.; Galván, J.A.; Robinson, H.P.C.; Zlobec, I.; et al. Synaptic proximity enables NMDAR signalling to promote brain metastasis. *Nature* **2019**, *573*, 526–531.](http://paperpile.com/b/Ha8zXc/4jdq9)

55. [Venkataramani, V.; Tanev, D.I.; Strahle, C.; Studier-Fischer, A.; Fankhauser, L.; Kessler, T.; Körber, C.; Kardorff, M.; Ratliff, M.; Xie, R.; et al. Glutamatergic synaptic input to glioma cells drives brain tumour progression. *Nature* **2019**, *573*, 532–538.](http://paperpile.com/b/Ha8zXc/gSooU)

56. [Pasquier, J.; Galas, L.; Boulangé-Lecomte, C.; Rioult, D.; Bultelle, F.; Magal, P.; Webb, G.; Le Foll, F. Different modalities of intercellular membrane exchanges mediate cell-to-cell p-glycoprotein transfers in MCF-7 breast cancer cells. *J. Biol. Chem.* **2012**, *287*, 7374–7387.](http://paperpile.com/b/Ha8zXc/mKSaT)

57. [Carter, K.P.; Hanna, S.; Genna, A.; Lewis, D.; Segall, J.E.; Cox, D. Macrophages enhance 3D invasion in a breast cancer cell line by induction of tumor cell tunneling nanotubes. *Cancer Rep.* **2019**, *2*, doi:](http://paperpile.com/b/Ha8zXc/wiUBA)[10.1002/cnr2.1213](http://dx.doi.org/10.1002/cnr2.1213)[.](http://paperpile.com/b/Ha8zXc/wiUBA)

58. [Hanna, S.J.; McCoy-Simandle, K.; Leung, E.; Genna, A.; Condeelis, J.; Cox, D. Tunneling nanotubes, a novel mode of tumor cell-macrophage communication in tumor cell invasion. *J. Cell Sci.* **2019**, *132*, doi:](http://paperpile.com/b/Ha8zXc/HS6yH)[10.1242/jcs.223321](http://dx.doi.org/10.1242/jcs.223321)[.](http://paperpile.com/b/Ha8zXc/HS6yH)

59. [Patheja, P.; Sahu, K. Macrophage conditioned medium induced cellular network formation in MCF-7 cells through enhanced tunneling nanotube formation and tunneling nanotube mediated release of viable cytoplasmic fragments. *Exp. Cell Res.* **2017**, *355*, 182–193.](http://paperpile.com/b/Ha8zXc/Rl94K)

60. [McLachlan, E.; Shao, Q.; Laird, D.W. Connexins and gap junctions in mammary gland development and breast cancer progression. *J. Membr. Biol.* **2007**, *218*, 107–121.](http://paperpile.com/b/Ha8zXc/wPZCq)

61. [Sinha, G.; Ferrer, A.I.; Moore, C.A.; Naaldijk, Y.; Rameshwar, P. Gap Junctions and Breast Cancer Dormancy. *Trends Cancer Res.* **2020**, *6*, 348–357.](http://paperpile.com/b/Ha8zXc/j9A3Z)

62. [Phillips, S.L.; Williams, C.B.; Zambrano, J.N.; Williams, C.J.; Yeh, E.S. Connexin 43 in the development and progression of breast cancer: What’s the connection? (Review). *Int. J. Oncol.* **2017**, *51*, 1005–1013.](http://paperpile.com/b/Ha8zXc/qrWsn)

63. [Grek, C.L.; Rhett, J.M.; Bruce, J.S.; Ghatnekar, G.S.; Yeh, E.S. Connexin 43, breast cancer tumor suppressor: Missed connections? *Cancer Lett.* **2016**, *374*, 117–126.](http://paperpile.com/b/Ha8zXc/49R3L)

64. [Busby, M.; Hallett, M.T.; Plante, I. The Complex Subtype-Dependent Role of Connexin 43 (GJA1) in Breast Cancer. *Int. J. Mol. Sci.* **2018**, *19*, doi:](http://paperpile.com/b/Ha8zXc/Zx5Se)[10.3390/ijms19030693](http://dx.doi.org/10.3390/ijms19030693)[.](http://paperpile.com/b/Ha8zXc/Zx5Se)

65. [Chen, Q.; Boire, A.; Jin, X.; Valiente, M.; Er, E.E.; Lopez-Soto, A.; Jacob, L.; Patwa, R.; Shah, H.; Xu, K.; et al. Carcinoma-astrocyte gap junctions promote brain metastasis by cGAMP transfer. *Nature* **2016**, *533*, 493–498.](http://paperpile.com/b/Ha8zXc/XkjSp)

66. [Ran, F.A.; Hsu, P.D.; Wright, J.; Agarwala, V.; Scott, D.A.; Zhang, F. Genome engineering using the CRISPR-Cas9 system. *Nat. Protoc.* **2013**, *8*, 2281–2308.](http://paperpile.com/b/Ha8zXc/yjuo7)

67. [Kleinstiver, B.P.; Pattanayak, V.; Prew, M.S.; Tsai, S.Q.; Nguyen, N.T.; Zheng, Z.; Joung, J.K. High-fidelity CRISPR-Cas9 nucleases with no detectable genome-wide off-target effects. *Nature* **2016**, *529*, 490–495.](http://paperpile.com/b/Ha8zXc/A3JZf)

68. [Shao, Q.; Wang, H.; McLachlan, E.; Veitch, G.I.L.; Laird, D.W. Down-regulation of Cx43 by retroviral delivery of small interfering RNA promotes an aggressive breast cancer cell phenotype. *Cancer Res.* **2005**, *65*, 2705–2711.](http://paperpile.com/b/Ha8zXc/y0li9)

69. [Keller, K.E.; Bradley, J.M.; Sun, Y.Y.; Yang, Y.-F.; Acott, T.S. Tunneling Nanotubes are Novel Cellular Structures That Communicate Signals Between Trabecular Meshwork Cells. *Invest. Ophthalmol. Vis. Sci.* **2017**, *58*, 5298–5307.](http://paperpile.com/b/Ha8zXc/NLMV9)

70. [Hanna, S.J.; McCoy-Simandle, K.; Miskolci, V.; Guo, P.; Cammer, M.; Hodgson, L.; Cox, D. The Role of Rho-GTPases and actin polymerization during Macrophage Tunneling Nanotube Biogenesis. *Sci. Rep.* **2017**, *7*, 8547.](http://paperpile.com/b/Ha8zXc/9vrg7)

71. [Fostok, S.; El-Sibai, M.; Bazzoun, D.; Lelièvre, S.; Talhouk, R. Connexin 43 Loss Triggers Cell Cycle Entry and Invasion in Non-Neoplastic Breast Epithelium: A Role for Noncanonical Wnt Signaling. *Cancers*  **2019**, *11*, doi:](http://paperpile.com/b/Ha8zXc/RVSvi)[10.3390/cancers11030339](http://dx.doi.org/10.3390/cancers11030339)[.](http://paperpile.com/b/Ha8zXc/RVSvi)

72. [Xie, X.; Chen, C.; Huang, K.; Wang, S.; Hao, J.; Huang, J.; Huang, H. RhoA/rho kinase signaling reduces connexin43 expression in high glucose-treated glomerular mesangial cells with zonula occludens-1 involvement. *Exp. Cell Res.* **2014**, *327*, 276–286.](http://paperpile.com/b/Ha8zXc/exc4y)

73. [Derangeon, M.; Bourmeyster, N.; Plaisance, I.; Pinet-Charvet, C.; Chen, Q.; Duthe, F.; Popoff, M.R.; Sarrouilhe, D.; Hervé, J.-C. RhoA GTPase and F-actin dynamically regulate the permeability of Cx43-made channels in rat cardiac myocytes. *J. Biol. Chem.* **2008**, *283*, 30754–30765.](http://paperpile.com/b/Ha8zXc/mmmG2)

74. [Ponsaerts, R.; D’hondt, C.; Hertens, F.; Parys, J.B.; Leybaert, L.; Vereecke, J.; Himpens, B.; Bultynck, G. RhoA GTPase switch controls Cx43-hemichannel activity through the contractile system. *PLoS One* **2012**, *7*, e42074.](http://paperpile.com/b/Ha8zXc/Lhg2D)

75. [Tatsumi, E.; Yamanaka, H.; Kobayashi, K.; Yagi, H.; Sakagami, M.; Noguchi, K. RhoA/ROCK pathway mediates p38 MAPK activation and morphological changes downstream of P2Y12/13 receptors in spinal microglia in neuropathic pain. *Glia* **2015**, *63*, 216–228.](http://paperpile.com/b/Ha8zXc/5dswM)

76. [Kameritsch, P.; Kiemer, F.; Beck, H.; Pohl, U.; Pogoda, K. Cx43 increases serum induced filopodia formation via activation of p21-activated protein kinase 1. *Biochim. Biophys. Acta* **2015**, *1853*, 2907–2917.](http://paperpile.com/b/Ha8zXc/NnodH)

77. [Coniglio, S.J.; Zavarella, S.; Symons, M.H. Pak1 and Pak2 mediate tumor cell invasion through distinct signaling mechanisms. *Mol. Cell. Biol.* **2008**, *28*, 4162–4172.](http://paperpile.com/b/Ha8zXc/9VR7J)

78. [Delage, E.; Cervantes, D.C.; Pénard, E.; Schmitt, C.; Syan, S.; Disanza, A.; Scita, G.; Zurzolo, C. Differential identity of Filopodia and Tunneling Nanotubes revealed by the opposite functions of actin regulatory complexes. *Sci. Rep.* **2016**, *6*, 39632.](http://paperpile.com/b/Ha8zXc/5TXdu)

79. [Howe, A.K. Regulation of actin-based cell migration by cAMP/PKA. *Biochim. Biophys. Acta* **2004**, *1692*, 159–174.](http://paperpile.com/b/Ha8zXc/po6IN)

80. [Gerits, N.; Mikalsen, T.; Kostenko, S.; Shiryaev, A.; Johannessen, M.; Moens, U. Modulation of F-actin rearrangement by the cyclic AMP/cAMP-dependent protein kinase (PKA) pathway is mediated by MAPK-activated protein kinase 5 and requires PKA-induced nuclear export of MK5. *J. Biol. Chem.* **2007**, *282*, 37232–37243.](http://paperpile.com/b/Ha8zXc/EloJC)

81. [Pidoux, G.; Taskén, K. Anchored PKA as a gatekeeper for gap junctions. *Commun. Integr. Biol.* **2015**, *8*, e1057361.](http://paperpile.com/b/Ha8zXc/QAXeV)

82. [Arnold, J.M.; Phipps, M.W.; Chen, J.; Phipps, J. Cellular sublocalization of Cx43 and the establishment of functional coupling in IMR-32 neuroblastoma cells. *Mol. Carcinog.* **2005**, *42*, 159–169.](http://paperpile.com/b/Ha8zXc/LazOo)

83. [Qiao, J.; Huang, F.; Lum, H. PKA inhibits RhoA activation: a protection mechanism against endothelial barrier dysfunction. *Am. J. Physiol. Lung Cell. Mol. Physiol.* **2003**, *284*, L972–80.](http://paperpile.com/b/Ha8zXc/j154L)

84. [Leemhuis, J.; Boutillier, S.; Schmidt, G.; Meyer, D.K. The protein kinase A inhibitor H89 acts on cell morphology by inhibiting Rho kinase. *J. Pharmacol. Exp. Ther.* **2002**, *300*, 1000–1007.](http://paperpile.com/b/Ha8zXc/2D7kZ)

85. [Huveneers, S.; Danen, E.H.J. Adhesion signaling - crosstalk between integrins, Src and Rho. *J. Cell Sci.* **2009**, *122*, 1059–1069.](http://paperpile.com/b/Ha8zXc/SFarz)

86. [Costa, P.; Scales, T.M.E.; Ivaska, J.; Parsons, M. Integrin-specific control of focal adhesion kinase and RhoA regulates membrane protrusion and invasion. *PLoS One* **2013**, *8*, e74659.](http://paperpile.com/b/Ha8zXc/FNTTy)

87. [Jaraíz-Rodríguez, M.; Tabernero, M.D.; González-Tablas, M.; Otero, A.; Orfao, A.; Medina, J.M.; Tabernero, A. A Short Region of Connexin43 Reduces Human Glioma Stem Cell Migration, Invasion, and Survival through Src, PTEN, and FAK. *Stem Cell Reports* **2017**, *9*, 451–463.](http://paperpile.com/b/Ha8zXc/XwmR3)

88. [Matsuuchi, L.; Naus, C.C. Gap junction proteins on the move: connexins, the cytoskeleton and migration. *Biochim. Biophys. Acta* **2013**, *1828*, 94–108.](http://paperpile.com/b/Ha8zXc/4B0Aj)

89. [Aftab, Q.; Mesnil, M.; Ojefua, E.; Poole, A.; Noordenbos, J.; Strale, P.-O.; Sitko, C.; Le, C.; Stoynov, N.; Foster, L.J.; et al. Cx43-Associated Secretome and Interactome Reveal Synergistic Mechanisms for Glioma Migration and MMP3 Activation. *Front. Neurosci.* **2019**, *13*, 143.](http://paperpile.com/b/Ha8zXc/Hjzn7)

90. [Belliveau, D.J.; Bani-Yaghoub, M.; McGirr, B.; Naus, C.C.G.; Rushlow, W.J. Enhanced neurite outgrowth in PC12 cells mediated by connexin hemichannels and ATP. *J. Biol. Chem.* **2006**, *281*, 20920–20931.](http://paperpile.com/b/Ha8zXc/VGHP5)

91. [Wang, X.; Bukoreshtliev, N.V.; Gerdes, H.-H. Developing neurons form transient nanotubes facilitating electrical coupling and calcium signaling with distant astrocytes. *PLoS One* **2012**, *7*, e47429.](http://paperpile.com/b/Ha8zXc/FGFwj)

92. [Martin, K.; Reimann, A.; Fritz, R.D.; Ryu, H.; Jeon, N.L.; Pertz, O. Spatio-temporal co-ordination of RhoA, Rac1 and Cdc42 activation during prototypical edge protrusion and retraction dynamics. *Sci. Rep.* **2016**, *6*, 21901.](http://paperpile.com/b/Ha8zXc/Wpkre)

93. [Osteikoetxea-Molnár, A.; Szabó-Meleg, E.; Tóth, E.A.; Oszvald, Á.; Izsépi, E.; Kremlitzka, M.; Biri, B.; Nyitray, L.; Bozó, T.; Németh, P.; et al. The growth determinants and transport properties of tunneling nanotube networks between B lymphocytes. *Cell. Mol. Life Sci.* **2016**, *73*, 4531–4545.](http://paperpile.com/b/Ha8zXc/rlZQd)

94. [Gao, S.-Y.; Li, C.-Y.; Chen, J.; Pan, L.; Saito, S.; Terashita, T.; Saito, K.; Miyawaki, K.; Shigemoto, K.; Mominoki, K.; et al. Rho-ROCK signal pathway regulates microtubule-based process formation of cultured podocytes--inhibition of ROCK promoted process elongation. *Nephron Exp. Nephrol.* **2004**, *97*, e49–61.](http://paperpile.com/b/Ha8zXc/WRete)

95. [Aburima, A.; Wraith, K.S.; Raslan, Z.; Law, R.; Magwenzi, S.; Naseem, K.M. cAMP signaling regulates platelet myosin light chain (MLC) phosphorylation and shape change through targeting the RhoA-Rho kinase-MLC phosphatase signaling pathway. *Blood* **2013**, *122*, 3533–3545.](http://paperpile.com/b/Ha8zXc/uhLLb)

96. [Anderson, S.C.; Stone, C.; Tkach, L.; SundarRaj, N. Rho and Rho-kinase (ROCK) signaling in adherens and gap junction assembly in corneal epithelium. *Invest. Ophthalmol. Vis. Sci.* **2002**, *43*, 978–986.](http://paperpile.com/b/Ha8zXc/2SfWF)

97. [Suh, H.N.; Kim, M.O.; Han, H.J. Laminin-111 stimulates proliferation of mouse embryonic stem cells through a reduction of gap junctional intercellular communication via RhoA-mediated Cx43 phosphorylation and dissociation of Cx43/ZO-1/drebrin complex. *Stem Cells Dev.* **2012**, *21*, 2058–2070.](http://paperpile.com/b/Ha8zXc/uDSts)

98. [Kim, H.-J.; Kim, M.-J.; Mostafa, M.N.; Park, J.-H.; Choi, H.-S.; Kim, Y.-S.; Choi, E.-K. RhoA/ROCK Regulates Prion Pathogenesis by Controlling Connexin 43 Activity. *Int. J. Mol. Sci.* **2020**, *21*, doi:](http://paperpile.com/b/Ha8zXc/iDJj5)[10.3390/ijms21041255](http://dx.doi.org/10.3390/ijms21041255)[.](http://paperpile.com/b/Ha8zXc/iDJj5)

99. [Mendoza-Naranjo, A.; Cormie, P.; Serrano, A.E.; Hu, R.; O’Neill, S.; Wang, C.M.; Thrasivoulou, C.; Power, K.T.; White, A.; Serena, T.; et al. Targeting Cx43 and N-cadherin, which are abnormally upregulated in venous leg ulcers, influences migration, adhesion and activation of Rho GTPases. *PLoS One* **2012**, *7*, e37374.](http://paperpile.com/b/Ha8zXc/SvQck)

100. [Jia, Z.; Vadnais, J.; Lu, M.L.; Noël, J.; Nabi, I.R. Rho/ROCK-dependent pseudopodial protrusion and cellular blebbing are regulated by p38 MAPK in tumour cells exhibiting autocrine c-Met activation. *Biol. Cell* **2006**, *98*, 337–351.](http://paperpile.com/b/Ha8zXc/SKsmN)

101. [Damodaran, N.; Dilna, A.; Kielkopf, C.S.; Kagedal, K.; Ollinger, K.; Nath, S. Amyloid-β induced membrane damage instigates tunneling nanotubes by exploiting PAK1 dependent actin remodulation. *bioRxiv* 2020, 655340.](http://paperpile.com/b/Ha8zXc/WqvdI)

102. [Song, C.; Perides, G.; Wang, D.; Liu, Y.F. beta-Amyloid peptide induces formation of actin stress fibers through p38 mitogen-activated protein kinase. *J. Neurochem.* **2002**, *83*, 828–836.](http://paperpile.com/b/Ha8zXc/Ztj6J)

103. [Mehta, P.B.; Robson, C.N.; Neal, D.E.; Leung, H.Y. Keratinocyte growth factor activates p38 MAPK to induce stress fibre formation in human prostate DU145 cells. *Oncogene* **2001**, *20*, 5359–5365.](http://paperpile.com/b/Ha8zXc/8WQBF)

104. [Katoh, K. Activation of Rho-kinase and focal adhesion kinase regulates the organization of stress fibers and focal adhesions in the central part of fibroblasts. *PeerJ* **2017**, *5*, e4063.](http://paperpile.com/b/Ha8zXc/YenZd)

105. [Francis, R.; Xu, X.; Park, H.; Wei, C.-J.; Chang, S.; Chatterjee, B.; Lo, C. Connexin43 modulates cell polarity and directional cell migration by regulating microtubule dynamics. *PLoS One* **2011**, *6*, e26379.](http://paperpile.com/b/Ha8zXc/OZECQ)

106. [Sáenz-de-Santa-María, I.; Bernardo-Castiñeira, C.; Enciso, E.; García-Moreno, I.; Chiara, J.L.; Suarez, C.; Chiara, M.-D. Control of long-distance cell-to-cell communication and autophagosome transfer in squamous cell carcinoma via tunneling nanotubes. *Oncotarget* **2017**, *8*, 20939–20960.](http://paperpile.com/b/Ha8zXc/8GlSc)

107. [Spray, D.C.; Hanstein, R.; Lopez-Quintero, S.V.; Stout, R.F., Jr; Suadicani, S.O.; Thi, M.M. Gap junctions and Bystander Effects: Good Samaritans and executioners. *Wiley Interdiscip. Rev. Membr. Transp. Signal.* **2013**, *2*, 1–15.](http://paperpile.com/b/Ha8zXc/VV5xa)

108. [Chen, C.-H.; Mayo, J.N.; Gourdie, R.G.; Johnstone, S.R.; Isakson, B.E.; Bearden, S.E. The connexin 43/ZO-1 complex regulates cerebral endothelial F-actin architecture and migration. *Am. J. Physiol. Cell Physiol.* **2015**, *309*, C600–7.](http://paperpile.com/b/Ha8zXc/Ul059)

109. [Thayanithy, V.; Babatunde, V.; Dickson, E.L.; Wong, P.; Oh, S.; Ke, X.; Barlas, A.; Fujisawa, S.; Romin, Y.; Moreira, A.L.; et al. Tumor exosomes induce tunneling nanotubes in lipid raft-enriched regions of human mesothelioma cells. *Exp. Cell Res.* **2014**, *323*, 178–188.](http://paperpile.com/b/Ha8zXc/IQrbG)

110. [Dubois, F.; Jean-Jacques, B.; Roberge, H.; Bénard, M.; Galas, L.; Schapman, D.; Elie, N.; Goux, D.; Keller, M.; Maille, E.; et al. A role for RASSF1A in tunneling nanotube formation between cells through GEFH1/Rab11 pathway control. *Cell Commun. Signal.* **2018**, *16*, 66.](http://paperpile.com/b/Ha8zXc/3UXRj)

111. [Gilleron, J.; Carette, D.; Fiorini, C.; Dompierre, J.; Macia, E.; Denizot, J.-P.; Segretain, D.; Pointis, G. The large GTPase dynamin2: a new player in connexin 43 gap junction endocytosis, recycling and degradation. *Int. J. Biochem. Cell Biol.* **2011**, *43*, 1208–1217.](http://paperpile.com/b/Ha8zXc/fj7hz)

112. [Zhu, S.; Bhat, S.; Syan, S.; Kuchitsu, Y.; Fukuda, M.; Zurzolo, C. Rab11a-Rab8a cascade regulates the formation of tunneling nanotubes through vesicle recycling. *J. Cell Sci.* **2018**, *131*, doi:](http://paperpile.com/b/Ha8zXc/U6EeU)[10.1242/jcs.215889](http://dx.doi.org/10.1242/jcs.215889)[.](http://paperpile.com/b/Ha8zXc/U6EeU)

113. [Chen, W.; Guo, Y.; Yang, W.; Chen, L.; Ren, D.; Wu, C.; He, B.; Zheng, P.; Tong, W. Phosphorylation of connexin 43 induced by traumatic brain injury promotes exosome release. *J. Neurophysiol.* **2018**, *119*, 305–311.](http://paperpile.com/b/Ha8zXc/1SdpQ)

114. [Batista-Almeida, D.; Ribeiro-Rodrigues, T.; Martins-Marques, T.; Cortes, L.; Antunes, M.J.; Antunes, P.E.; Gonçalves, L.; Brou, C.; Aasen, T.; Zurzolo, C.; et al. Ischaemia impacts TNT-mediated communication between cardiac cells. *Current Research in Cell Biology* **2020**, *1*, 100001.](http://paperpile.com/b/Ha8zXc/5Eo91)

115. [Aasen, T.; Izpisúa Belmonte, J.C. Isolation and cultivation of human keratinocytes from skin or plucked hair for the generation of induced pluripotent stem cells. *Nat. Protoc.* **2010**, *5*, 371–382.](http://paperpile.com/b/Ha8zXc/sggP6)

| 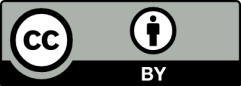 | © 2020 by the authors. Submitted for possible open access publication under the terms and conditions of the Creative Commons Attribution (CC BY) license (http://creativecommons.org/licenses/by/4.0/). |
| --- | --- |
